1 **Dysregulation of innate immune signaling in animal models of Spinal Muscular Atrophy**

2

3 Eric L. Garcia<sup>1,2</sup>, Rebecca E. Steiner<sup>1,5,#</sup>, Amanda C. Raimer<sup>1,3%</sup>, Laura E. Herring<sup>4</sup>, A. Gregory

4 Matera<sup>1,3,5,6,7\*</sup>, Ashlyn M. Spring<sup>1,8\*</sup>

5

6 <sup>1</sup>Integrative Program for Biological and Genome Sciences, University of North Carolina at  
7 Chapel Hill, Chapel Hill NC, USA

8 <sup>2</sup>Department of Biology, University of Kentucky, Lexington KY, USA

9 <sup>3</sup>Curriculum in Genetics and Molecular Biology, University of North Carolina at Chapel Hill

10 <sup>4</sup>Department of Pharmacology, University of North Carolina at Chapel Hill

11 <sup>5</sup>Department of Biology, University of North Carolina at Chapel Hill

12 <sup>6</sup>Department of Genetics, University of North Carolina at Chapel Hill

13 <sup>7</sup>Lineberger Comprehensive Cancer Center, University of North Carolina at Chapel Hill

14 <sup>8</sup>Department of Biology, University of North Carolina at Greensboro, Greensboro NC, USA

15

16

17 <sup>#</sup>Current Address: Lake Erie College of Osteopathic Medicine, Bradenton FL, USA

18 <sup>%</sup>Current Address: Radford University, Radford VA, USA

19

20

21 **\*Corresponding Authors:**

22

23 A. Gregory Matera  
24 University of North Carolina at Chapel Hill  
25 Chapel Hill, NC, 27599  
26 Email: [matera@unc.edu](mailto:matera@unc.edu)

or  
Ashlyn M. Spring  
University of North Carolina at Greensboro  
Greensboro, NC, 27402  
Email: [amspring2@uncg.edu](mailto:amspring2@uncg.edu)

27

28

29 **ABSTRACT**

30 **Background:** Spinal Muscular Atrophy (SMA) is a devastating neuromuscular disease caused  
31 by hypomorphic loss of function in the Survival Motor Neuron (SMN) protein. SMA presents  
32 across broad spectrum of disease severity. Unfortunately, vertebrate models of intermediate  
33 SMA have been difficult to generate and are thus unable to address key aspects of disease  
34 etiology. To address these issues, we developed a *Drosophila* model system that recapitulates  
35 the full range of SMA severity, allowing studies of pre-onset biology as well as late-stage  
36 disease processes.

37 **Results:** Here, we carried out transcriptomic and proteomic profiling of mild and intermediate  
38 *Drosophila* models of SMA to elucidate molecules and pathways that contribute to the disease.  
39 Using this approach, we elaborated a role for the SMN complex in the regulation of innate  
40 immune signaling. We find that mutation or tissue-specific depletion of SMN induces  
41 hyperactivation of the Immune Deficiency (IMD) and Toll pathways, leading to overexpression of  
42 antimicrobial peptides (AMPs) and ectopic formation of melanotic masses in the absence of an  
43 external challenge. Furthermore, knockdown of downstream targets of these signaling pathways  
44 reduced melanotic mass formation caused by SMN loss. Importantly, we identify SMN as a  
45 negative regulator of an ubiquitylation complex that includes Traf6, Bendless and Diap2, and  
46 plays a pivotal role in several signaling networks.

47 **Conclusions:** In alignment with recent research on other neurodegenerative diseases, these  
48 findings suggest that hyperactivation of innate immunity contributes to SMA pathology. This  
49 work not only provides compelling evidence that hyperactive innate immune signaling is a  
50 primary effect of SMN depletion, but it also suggests that the SMN complex plays a regulatory  
51 role in this process *in vivo*. In summary, immune dysfunction in SMA is a consequence of  
52 reduced SMN levels and is driven by cellular and molecular mechanisms that are conserved  
53 between insects and mammals.

54

55 **Keywords:** Neuromuscular disease; Traf6; Ubc13; NF- $\kappa$ B; Toll like receptors, TLR; Tumor

56 necrosis factor signaling, TNF

57

58 **Funding:** This work was supported by NIH/NIGMS grant R35-GM136435 (to A.G.M.)

59

## 60 **BACKGROUND**

61 Spinal Muscular Atrophy (SMA) is a neuromuscular disease caused by mutations in the human  
62 *Survival Motor Neuron 1 (SMN1)* gene and the accompanying reduction in levels of SMN  
63 protein (Lefebvre *et al.* 1995). In humans and SMA animal models, complete loss of SMN  
64 function does not lead to SMA; it causes developmental arrest and early lethality (O'Hern *et al.*  
65 2017). Hypomorphic point mutations in *SMN1* and/or reduced levels of full-length SMN protein  
66 cause the disease (Lefebvre *et al.* 1995, 1997). The age-of-onset and severity of the disease  
67 varies widely, leading to a historical classification of SMA into three distinct subtypes, Type I  
68 (Werdnig-Hoffman disease, early infantile onset), Type II (intermediate late infant onset), and  
69 Type III (Kugelberg-Welander, childhood onset) (Kugelberg and Welander 1956; Darras and  
70 Finkel 2017; Oskoui *et al.* 2017). More recently, clinicians have increasingly recognized that  
71 SMA is better characterized as a broad-spectrum disorder, ranging from severe (prenatal onset)  
72 to nearly asymptomatic (Dubowitz 2017; Singh *et al.* 2021). SMA phenotypic severity is  
73 inversely proportional to SMN protein levels; however, the proximal trigger of the disease  
74 remains a mystery.

75         Mouse models of intermediate or late-onset SMA have been difficult to generate.  
76 Mutations at the endogenous mouse *Smn* locus or copy number changes in human *SMN2* (an  
77 *SMN1* paralog) transgenes cause dramatic shifts in phenotype from mild and largely unaffected,  
78 to very severe, with onset of symptoms in utero and death between 4-14 days (reviewed in  
79 Burghes *et al.* 2017; Oskoui *et al.* 2017). To circumvent these problems, we developed a  
80 *Drosophila* model system (Praveen *et al.* 2012, 2014). Using a series of SMA-causing missense  
81 alleles, we have shown that this system recapitulates the wide-spectrum of phenotypic severity  
82 seen in human patients (Praveen *et al.* 2014; Garcia *et al.* 2016; Gray *et al.* 2018; Spring *et al.*  
83 2019; Raimer *et al.* 2020; Gupta *et al.* 2021). Importantly, this system provides an opportunity to  
84 study all stages of the disease, from pre-onset biology to late-stage processes (Spring *et al.*  
85 2019; Raimer *et al.* 2020; Gupta *et al.* 2021).

86           The phenotypes associated with *Drosophila* models of SMA include impaired  
87 locomotion, neuromuscular abnormalities, developmental delays, decreased viability, and  
88 reduced life span (Chan *et al.* 2003; Rajendra *et al.* 2007; Chang *et al.* 2008; Praveen *et al.*  
89 2012, 2014; Imlach *et al.* 2012; Garcia *et al.* 2013; Spring *et al.* 2019). In notable agreement  
90 with the onset of the human disease, our fruitfly models of SMA also exhibit progressive loss of  
91 limb motility, displaying a more rapid decline in posterior versus anterior appendages (Spring *et al.*  
92 *et al.* 2019). Additionally, specific mutations that affect the SMN Tudor domain were recently  
93 shown to affect SMN protein levels in a temperature sensitive manner (Raimer *et al.* 2020).  
94 Hence, *Drosophila* models of SMA are continuing to reveal how individual mutations disrupt  
95 SMN function, contributing to different aspects of the disease.

96           SMN protein is involved in the biogenesis of small nuclear ribonucleoproteins (snRNPs),  
97 core components of the spliceosome (Matera and Wang 2014). SMN carries out its functions in  
98 the assembly of snRNPs primarily in the cytoplasm (Matera and Wang 2014). *Smn* and *Phax*  
99 (*Phosphorylated Adaptor for RNA export*) null mutants exhibit an overlapping set of alternative  
100 splicing differences relative to wild-type animals (Garcia *et al.* 2016). *Phax* exports small nuclear  
101 RNAs (snRNAs) from the nucleus for assembly into snRNPs by *Smn* and the SMN complex  
102 (Ohno *et al.* 2000; Matera and Wang 2014). Recently, a common allele-specific *RpS21*  
103 alternative splicing event was shown to modify the larval lethality of *Phax*, but not *Smn*, mutants  
104 (Garcia 2022). Transcriptomic profiling of various *Smn* null and missense mutants has revealed  
105 the activation of an innate immune response that correlates with phenotypic severity of the  
106 different mutants (Garcia *et al.* 2013, 2016). Conspicuously, mutations in the *Phax* gene do not  
107 cause similar transcriptomic signatures of activated innate-immune signaling, which suggests  
108 that SMN may have a specific function in cellular immunity (Garcia *et al.* 2016).

109           Defects in the development of immune cells and tissues have been reported in several  
110 mouse models of SMA (Deguise and Kothary 2017; Khairallah *et al.* 2017; Thomson *et al.* 2017;  
111 Deguise *et al.* 2017). SMA model mice have smaller spleens and display altered red pulp

112 macrophage morphology; events that reportedly precede evidence of neurodegeneration  
113 (Deguise and Kothary 2017; Khairallah *et al.* 2017; Thomson *et al.* 2017; Deguise *et al.* 2017).  
114 More recently, dysregulation of innate immunity was reported in pediatric SMA patients, as they  
115 exhibit treatment responsive changes in inflammatory cytokine profiles (Bonanno *et al.* 2022;  
116 Nuzzo *et al.* 2023). Accumulating evidence suggests that SMN loss disrupts the immune  
117 system, contributing to excessive neuroinflammation and neurodegeneration.

118 Here, we show that the transcriptomes and proteomes of SMA model flies similarly  
119 display evidence of dysregulated innate immunity. Specifically, these SMA models exhibited an  
120 increase in transcripts and proteins involved in the *Drosophila* Immune Deficiency (IMD) and  
121 Toll signaling pathways. Concordantly, these animals also frequently displayed pigmented  
122 nodules (a.k.a. melanotic masses) that correlated with the molecular signatures of activated  
123 immune signaling. Knockdown of specific downstream targets of these signaling pathways  
124 ameliorated formation of melanotic masses caused by *Smn* mutation or depletion. Overall,  
125 findings here suggest that SMN protein loss induces a hyperactivation of innate immune  
126 signaling and a melanization defense response that correlates with the phenotypic severity of  
127 SMA-causing missense alleles.

128

129

## 130 **METHODS**

### 131 ***Drosophila* Strains and Husbandry**

132 Fly stocks were maintained on molasses and agar at room temperature (25°C) in vials or half-  
133 pint bottles. As previously described, FLAG-*Smn*<sup>Tg</sup> transgenes were site-specifically integrated  
134 into a PhiC31 landing site (86Fb) that had been recombined into the *Smn*<sup>X7</sup> null background  
135 (Bischof *et al.* 2007; Praveen *et al.* 2012, 2014; Spring *et al.* 2019). The *Smn*<sup>X7</sup> null line was a  
136 gift of S. Artavanis-Tsakonis (Harvard University, Cambridge, USA). C15-GAL4 (Brusich *et al.*  
137 2015) was a gift of A. Frank, University of Iowa (Iowa City, USA). All other GAL4/*UAS-RNAi*

138 stocks were obtained from the Bloomington Drosophila Stock Center (BDSC), see Table S14 for  
139 details.

140 To generate larvae expressing a single *Smn* missense mutant allele, *Smn*<sup>X7</sup>/TM6B-GFP  
141 virgin females were crossed to *Smn*<sup>X7</sup>, *Smn*<sup>Tg</sup>/TM6B-GFP males at 25°C. To reduce stress from  
142 overpopulation and/or competition from heterozygous siblings, crosses were performed on  
143 molasses plates with yeast paste, and GFP negative (*Smn*<sup>X7</sup>, *Smn*<sup>Tg</sup>/*Smn*<sup>X7</sup>) larvae were sorted  
144 into vials containing molasses fly food during the second instar larval stage. Sorted larvae were  
145 raised at 25°C until the desired developmental stage was reached.

146 Experiments involving *UAS-Smn-RNAi* expression were carried out at 29°C to maximize  
147 expression from the GAL4/*UAS* system and, therefore, the degree of *Smn* knockdown. To  
148 maintain consistency across experiments, we used molasses plates with yeast paste and  
149 subsequent sorting for all *Smn-RNAi* experiments.

150

### 151 **Tandem Mass Tag (TMT) Sample Preparation**

152 Cell lysates (100 µg; n=3) were lysed in 8M urea, 75 mM NaCl, 50 mM Tris, pH 8.5, reduced  
153 with 5mM DTT for 45 min at 37°C and alkylated with 15mM iodoacetamide for 30 min in the  
154 dark at room temperature. Samples were digested with LysC (Wako, 1:50 w/w) for 2 hr at 37°C,  
155 then diluted to 1M urea and digested with trypsin (Promega, 1:50 w/w) overnight at 37°C. The  
156 resulting peptide samples were acidified to 0.5% trifluoroacetic acid, desalted using desalting  
157 spin columns (Thermo), and the eluates were dried via vacuum centrifugation. Peptide  
158 concentration was determined using Quantitative Colorimetric Peptide Assay (Pierce).

159 Samples were labeled with TMT10plex (Thermo Fisher). 40 µg of each sample was  
160 reconstituted with 50 mM HEPES pH 8.5, then individually labeled with 100 µg of TMT reagent  
161 for 1 hr at room temperature. Prior to quenching, the labeling efficiency was evaluated by LC-  
162 MS/MS (Liquid Chromatography and Tandem Mass Spectrometry) analysis of a pooled sample  
163 consisting of 1ul of each sample. After confirming >98% efficiency, samples were quenched

164 with 50% hydroxylamine to a final concentration of 0.4%. Labeled peptide samples were  
165 combined 1:1, desalted using Thermo desalting spin column, and dried via vacuum  
166 centrifugation. The dried TMT-labeled sample was fractionated using high pH reversed phase  
167 HPLC (Mertins *et al.* 2018). Briefly, the samples were offline fractionated over a 90 min run, into  
168 96 fractions by high pH reverse-phase HPLC (Agilent 1260) using an Agilent Zorbax 300  
169 Extend-C18 column (3.5- $\mu$ m, 4.6  $\times$  250 mm) with mobile phase A containing 4.5 mM ammonium  
170 formate (pH 10) in 2% (vol/vol) LC-MS grade acetonitrile, and mobile phase B containing 4.5  
171 mM ammonium formate (pH 10) in 90% (vol/vol) LC-MS grade acetonitrile. The ninety-six  
172 resulting fractions were then concatenated in a non-continuous manner into twenty-four  
173 fractions and dried down via vacuum centrifugation and stored at -80°C until further analysis.

174

#### 175 **Liquid Chromatography-Tandem Mass Spectrometry (LC-MS/MS)**

176 Twenty-four proteome fractions were analyzed by LC-MS/MS using an Easy nLC 1200 coupled  
177 to an Orbitrap Fusion Lumos Tribrid mass spectrometer (Thermo Scientific). Samples were  
178 injected onto an Easy Spray PepMap C18 column (75  $\mu$ m id  $\times$  25 cm, 2  $\mu$ m particle size)  
179 (Thermo Scientific) and separated over a 120 min method. The gradient for separation  
180 consisted of 5–42% mobile phase B at a 250 nl/min flow rate, where mobile phase A was 0.1%  
181 formic acid in water and mobile phase B consisted of 0.1% formic acid in 80% ACN.

182 For the proteome fractions, the Lumos was operated in SPS-MS3 mode (McAlister *et al.*  
183 2014), with a 3s cycle time. Resolution for the precursor scan ( $m/z$  350–2000) was set to  
184 120,000 with a AGC target set to standard and a maximum injection time of 50 ms. MS2 scans  
185 consisted of CID normalized collision energy (NCE) 30; AGC target set to standard; maximum  
186 injection time of 50 ms; isolation window of 0.7 Da. Following MS2 acquisition, MS3 spectra  
187 were collected in SPS mode (10 scans per outcome); HCD set to 65; resolution set to 50,000;  
188 scan range set to 100-500; AGC target set to 200% with a 150 ms maximum inject time.

189



## 190 **TMT Data Analysis**

191 TMT proteome RAW files were processed using Proteome Discoverer version 2.5. 'TMT10' was  
192 used as the quantitation method. Peak lists were searched against a reviewed Uniprot  
193 drosophila database (downloaded Feb 2020 containing 21,973 sequences), appended with a  
194 common contaminants database, using Sequest HT within Proteome Discoverer. Data were  
195 searched with up to two missed trypsin cleavage sites and fixed modifications were set to TMT  
196 peptide N-terminus and Lys and carbamidomethyl Cys. Dynamic modifications were set to N-  
197 terminal protein acetyl and oxidation Met. Quantitation was set to MS3, precursor mass  
198 tolerance was set to 10 ppm and fragment mass tolerance was set to 0.5 Da. Peptide false  
199 discovery rate was set to 1%. Reporter abundance based on intensity, SPS mass matches  
200 threshold set to 50, and razor and unique peptides were used for quantitation.

201 Statistical analysis was performed within Proteome Discoverer (version 2.4). Benjamini  
202 Hochberg corrected p-values (q-values) were calculated for each pairwise comparison, and  
203 statistical significance is defined as  $q\text{-value} < 0.05$ . Log2 fold change (FC) ratios were calculated  
204 using the averaged normalized TMT intensities.

205 For Gene Ontology (GO) analysis, Uniprot protein IDs were converted to Flybase Gene  
206 IDs and gene symbols. GO enrichment was performed with FlyEnrichr, using the GO Biological  
207 Process (BP) category from AutoRIF (Chen *et al.* 2013; Kuleshov *et al.* 2016).

208

## 209 **RNA-seq Analysis**

210 RNA-seq analysis was performed on fastq files retrieved from the NCBI Gene Expression  
211 Omnibus (GEO). GEO accession numbers used here were: GSE49587, GSE81121, and  
212 GSE138183. Alignments of paired end reads were performed with HISAT2 and Ensemble  
213 release 109 of the *Drosophila melanogaster* genome (BDGP6.32) (Adams *et al.* 2000; Kim *et al.*  
214 2019). Differential expression of transcripts was performed with kallisto and sleuth (Bray *et al.*  
215 2016; Pimentel *et al.* 2017). For the determination of transcript abundance, the number of

216 bootstrap samples was set at 100. StringTie and DESeq2 were used to determine differential  
217 gene expression (Love *et al.* 2014; Pertea *et al.* 2015, 2016).

218

### 219 **Scoring Melanotic Masses**

220 Wandering third instar larvae were removed from vials, washed briefly in a room temperature  
221 water bath, dried, and placed on an agar plate under white light and 2X magnification. When  
222 melanotic masses were identified in a larva, both the size of the largest mass (size score) and  
223 the total number of masses (mass score) were qualitatively determined. Size scoring used the  
224 following criteria: small masses range in size from barely visible specks to smooth round dots  
225 with a diameter no more than 1/10th the width of the larva; medium masses range from anything  
226 larger than a small mass to those with a diameter up to 1/3 the larval width; large masses had a  
227 diameter greater than or equal to 1/3 the larval width. Larvae were manipulated to allow for  
228 observation of all sides/regions; observation was performed for at least 20 seconds in all cases.

229

### 230 **Statistical Analysis**

231 GraphPad Prism version 7 was used to calculate *p*-values for comparison of melanotic masses,  
232 using a one-way ANOVA with a Dunnett correction for multiple comparisons.

233

### 234 **Data Availability**

235 All *Drosophila* stocks are available upon request. The authors affirm that all data necessary for  
236 confirming the conclusions of the article are present within the article, figures, and tables. The  
237 tandem mass spectrometry labeling data have been deposited to the ProteomeXchange  
238 Consortium via the PRIDE partner repository (Perez-Riverol *et al.* 2022) using the dataset  
239 identifier PXD046801.

240

241

## 242 RESULTS

### 243 Quantitative proteomic analysis of *Smn* missense mutants identifies immune-induced 244 peptides.

245 Previously, we uncovered an increase in expression of genes associated with innate immunity  
246 in the transcriptomes of *Smn* null and missense mutant fly lines (Garcia *et al.* 2013, 2016);  
247 therefore, we sought to determine if the gene expression changes, identified by RNA-seq, are  
248 also reflected in the proteomes of hypomorphic *Smn* mutants. We therefore carried out  
249 proteomic analyses using tandem mass tag labeling and mass spectrometry (TMT-MS) on  
250 protein lysates from whole wandering third instar larvae. Animals expressing either Flag-*Smn*  
251 wild-type (WT) or SMA-causing missense mutant transgenes as their sole source of SMN  
252 protein were used. The transgenes were each inserted at the same ectopic locus and driven by  
253 the native *Smn* promoter in an otherwise *Smn*<sup>X7/X7</sup> null background (Praveen *et al.* 2012, 2014).  
254 We employed two different SMA patient-derived mutations located in distinct subdomains of the  
255 SMN protein, the Tudor domain (*Smn*<sup>Tg:V72G</sup>) and the tyrosine- and glycine-rich YG Box  
256 (*Smn*<sup>Tg:T205I</sup>), see Fig. 1A. The SMN Tudor domain binds symmetric dimethylarginine residues  
257 present at the C-termini of Sm proteins (Brahms *et al.* 2000, 2001), and the YG Box functions in  
258 SMN self-oligomerization (Liu *et al.* 1997; Talbot *et al.* 1997; Lorson *et al.* 1998; Martin *et al.*  
259 2012; Gray *et al.* 2018; Gupta *et al.* 2021). As previously described, T205I is a Class 3 (semi-  
260 lethal, ~10% eclosion) mutation, whereas V72G is more severe, categorized as a Class 2  
261 mutation, as these animals all die as early pupae (Spring *et al.* 2019; Raimer *et al.* 2020).

262 Overall, 5,857 *Drosophila* proteins were identified using TMT-MS (Tables S1-S3).  
263 Principal component analysis of TMT-MS quantified protein abundances showed good  
264 covariance levels (an average of ~10% per sample) for the three different *Smn* transgenic lines  
265 we tested: *Smn*<sup>Tg:WT,X7/X7</sup> (WT), *Smn*<sup>Tg:V72G,X7/X7</sup> (V72G), and *Smn*<sup>Tg:T205I,X7/X7</sup> (T205I), see Fig. 1B.  
266 Among the proteins quantified, only 282 proteins were differentially expressed (p.adj <0.05, log<sub>2</sub>  
267 fold change ±0.5) in the T205I mutant relative to WT control (Fig. 1C,D). Note that the control

268 animals expressing the WT rescue transgene are known to be slightly hypomorphic to begin  
269 with (Praveen *et al.* 2014; Spring *et al.* 2019), so that may account for the small number of  
270 observed differences. In contrast, the V72G mutant exhibited 2,003 differentially expressed  
271 proteins relative to WT control (Fig. 1C,E). Most of the protein abundance differences found in  
272 the T205I mutant (90%) were also seen in the V72G mutant (Fig. 1C). The V72G and T205I  
273 hypomorphs each display significant defects (in viability, locomotion, etc.) relative to the WT  
274 controls, but the phenotype of the V72G animals is more severe than that of T205I (Praveen *et*  
275 *al.* 2014; Spring *et al.* 2019). Thus, the observed changes in protein abundance correlate with  
276 overall phenotypic severity (Fig. 1D-E).

277

278 **Immune dysregulation lies at the intersection of SMA model proteomes and**  
279 **transcriptomes.**

280 We took advantage of an early pupal RNA-seq dataset we had previously generated for *Smn*  
281 WT, T205I and V72G animals (Garcia *et al.* 2016) (Tables S4-S5) to carry out a multi-omic  
282 analysis of transcriptomes and proteomes. Although the TMT-MS experiment detected only a  
283 subset of the genes that can be analyzed by RNA-seq (e.g. 6,000 vs. 13,000), proteins that  
284 were significantly altered in the mutants also tended to display a similar trend on the  
285 transcriptome level. To this end, correlation plots of the log<sub>2</sub> fold change ratios of the TMT-MS  
286 vs. total RNA-seq datasets showed good overall agreement between differences in RNA and  
287 protein abundance relative to the WT control (Fig. 1F,G).

288 Even though the milder T205I (Class 3) mutant had only ~300 detectable changes at the  
289 protein level, and only seven overlapping RNA and protein changes (Fig. 1F), most of these  
290 (five out of seven) were increased in the T205I compared to WT). Notably, this includes the  
291 *Baramicin* locus (containing two identical genes, *BaraA1* and *BaraA2*) that encode an immune-  
292 induced antifungal peptide (Hanson *et al.* 2021; Hanson and Lemaitre 2022). For simplicity, we  
293 refer to all transcripts and proteins that mapped to this locus as *BaraA2* or *BaraA2*, respectively

294 (Fig. 1F). By comparison, the overlapping differences between the transcriptome and proteome  
295 of the more severe V72G (Class 2) mutant include increases in numerous immune-induced and  
296 stress responsive gene products (Fig. 1G). We note that analysis of the T205I transcriptome  
297 identified increases in many of these same immune-induced molecules that were not captured  
298 by TMT-MS (Table S4). Strikingly, we observed small but significant increases in core upstream  
299 signaling factors like the NF- $\kappa$ B ortholog dorsal (dl) and larger increases in defense-responsive  
300 and downstream stress-responsive targets like BaraA2, Turandot C (TotC), and Gram-negative  
301 bacteria binding-like protein 3 (GNBP-like3). Hence, our multi-omic approach further highlights  
302 the hyperactivation of innate-immune signaling that accompanies partial SMN loss-of-function.

303 For additional comparisons to the *Smn* missense mutant proteomes, we used polyA+-  
304 RNA-seq datasets from two different *Smn* null mutant lines (Li 2020; Garcia 2013) (Tables S6-  
305 S11). The *Smn*<sup>X7/D</sup> null mutant transcriptome identified an increase in *BaraA2* and *SPH93*  
306 (*Serine protease homolog 93*) transcripts in both T205I and V72G proteomes (Fig. 1H and  
307 Tables S1-S3). The overlap between the *Smn*<sup>X7/D</sup> transcriptome and the V72G proteome was  
308 even more remarkable and included the core NF- $\kappa$ B-like factor, Rel (Fig. 1H and Table S11).  
309 Thus, the overlapping differences between the *Smn* null and missense mutants suggest that the  
310 observed hyperactivation of immune signaling is a common feature of SMN loss.

311 A key strength of this multi-omic approach is the ability to detect mRNA and protein  
312 isoform-specific differences. For this analysis we employed an additional, probabilistic RNA-seq  
313 pipeline to quantify discrete mRNA isoforms and maintain pseudoalignment information from  
314 different splice junctions, but with a focus on differential expression of transcripts (Bray *et al.*  
315 2016; Pimentel *et al.* 2017). Quantification of discernable transcript differences between *Smn*  
316 null and control animals revealed an increase in numerous transcripts associated with innate  
317 immunity in the mutants (Fig. S1A-B). Differences included changes in transcripts and proteins  
318 involved in innate immunity, such as the NF- $\kappa$ B orthologs dorsal (dl), Dorsal-related immunity  
319 factor (Dif), and Relish (Rel), (Fig. S1A-B).

320 Most striking, a comparison of the V72G proteome with the *Smn* null transcriptome  
321 revealed parallel isoform-specific changes for numerous transcripts and proteins (Fig. S1C).  
322 The congruous changes in RNA and protein isoforms included changes in molecules involved in  
323 innate immunity, including SPH93-RA/PA, TotC-RA/PA, GNBP-like3-RA/PA and Dif-RC/PC  
324 (Fig. S1C). In summary, the identification of overlapping changes in specific transcripts and  
325 protein isoforms further supports a uniquely well-coordinated activation of immune signaling in  
326 fly models of SMA.

327

### 328 **Partial loss of SMN function causes hyper-activation of innate immunity.**

329 SMA is a hypomorphic condition; total loss of function causes early developmental arrest and  
330 lethality (Schrank et al 1997; reviewed in O'Hern 2017). As detailed widely in the literature, *Smn*  
331 null mutants are thus poor disease models. Hence, we focused our efforts to identify drivers of  
332 the observed innate immune dysfunction on the *Smn* hypomorphs. Gene ontology (GO)  
333 analysis of protein abundance differences in the V72G dataset revealed a broad dysregulation  
334 of factors involved in pathogen defense response and innate immune signaling pathways (Fig.  
335 2A and Tables S12-S13). These include proteins involved in melanization and humoral defense  
336 responses to bacterial, fungal, and viral pathogens (Figs. 2A-B). Although the V72G mutant  
337 exhibited numerous increases in proteins involved in defense response pathways, a few of  
338 these proteins were also significantly upregulated in the less severe T205I animals (Fig. 2B).  
339 Importantly, both mutants displayed small but significant increases in NF- $\kappa$ B transcription  
340 factors (Fig. 2B).

341 Upregulation of defense response proteins occurs in the absence of an external immune  
342 challenge, supporting the notion that partial loss of SMN function causes hyper-activation of  
343 innate immune signaling. Consistent with this hypothesis, we frequently observed black,  
344 melanotic spots or granules in third instar *Smn* missense mutant larvae. Such granules are  
345 commonly referred to as pseudotumors, melanotic tumors, or melanotic masses (Minakhina and

346 Steward 2006; Boulet *et al.* 2018). These structures typically form in response to pathogens,  
347 tissue damage, and necrosis, but this defense response can also be triggered by different  
348 genetic perturbations (Minakhina and Steward 2006; Williams 2007; Gold and Brückner 2015;  
349 Banerjee *et al.* 2019).

350 Irrespective of the trigger, melanotic masses often form in the larval hemolymph, and  
351 can be readily observed through the transparent body wall (Minakhina and Steward 2006). We  
352 therefore carried out a systematic analysis of larval melanization (Fig. 3) in a battery of ten  
353 hypomorphic, SMA-causing *Smn* missense alleles developed in our laboratory (Praveen *et al.*  
354 2014; Spring *et al.* 2019). To quantify this phenotype, we scored both the size and number of  
355 melanotic masses in 50 wandering third instar larvae for each genotype. All lines examined  
356 displayed a statistically significant and robust increase in the presence of melanotic masses  
357 relative to the Oregon-R (OreR) controls (Fig. 3A). Larvae with a WT *Smn* transgene exhibited  
358 significantly fewer melanotic masses than *Smn* missense mutant lines but more than OreR (Fig.  
359 3A), consistent with our previous observations that the Flag-*Smn* WT transgenic line is mildly  
360 hypomorphic (Praveen *et al.* 2014; Spring *et al.* 2019). Size scoring (Fig. 3B) and counts of the  
361 total number of melanotic masses per animal (Fig. 3C) show similar trends to the overall  
362 incidence of masses. The number of melanotic masses correlated with the previously  
363 characterized phenotypic severity of the different *Smn* missense mutations (Fig. 3A-D) (Spring  
364 *et al.* 2019). These observations suggest that the function of SMN in immune tissues is  
365 conserved from flies to mammals and that *Smn* mutations in the fly can be used to model  
366 peripheral defects of SMA in addition to the canonical SMA-related neuromuscular phenotypes.

367

### 368 **The SMN-dependent hyper-activation of melanization is tissue-specific.**

369 To determine if the melanotic masses in fly models of SMA are downstream effects of tissue  
370 specific SMN loss, we used the *Drosophila* GAL4/UAS system and RNA interference (RNAi) to  
371 deplete SMN in specific tissues (Perkins *et al.* 2015). We and others have previously employed



372 this system to create partial SMN loss-of-function models that typically cause pupal lethality,  
373 although weakly viable adults can be obtained if the RNAi is performed at lower temperature,  
374 e.g. 25°C, see (Dimitriadi *et al.* 2010; Spring *et al.* 2019). Here, we employed two different  
375 *UAS:Smn* short hairpin (sh)RNA lines, P{TRiP.JF02057}attP2 (*Smn<sup>JF</sup>*-RNAi) and  
376 P{TRiP.HMC03832}attP40 (*Smn<sup>HM</sup>*-RNAi), at 29°C (Spring *et al.* 2019). Using a *daughterless*  
377 GAL4 driver (*da-Gal4*), we found that systemic SMN knockdown recapitulated the effects of the  
378 *Smn* missense mutations described above (Fig. 4A). Melanotic mass formation was dependent  
379 upon shRNA expression, as negative control lines (Gal4 driver-only, UAS:responder-only or  
380 OreR) showed no significant effects (Fig. 4A).

381 In *Drosophila*, the immune response is coordinated by the fat body, an organ that is  
382 functionally analogous to the mammalian liver and adipose tissue (Hoffmann and Reichhart  
383 2002; Ferrandon *et al.* 2007). The fat body signals to a group of macrophage-like cells,  
384 collectively called hemocytes (Banerjee *et al.* 2019). The molecular pathways and mechanisms  
385 that regulate hemocyte/macrophage development and activity are conserved from flies to  
386 humans (Williams 2007; Gold and Brückner 2015; Banerjee *et al.* 2019). When activated,  
387 hemocytes encapsulate invading particles and melanize them to sequester and kill pathogens  
388 (Banerjee *et al.* 2019). Depletion of SMN within the fat body and hemocytes (using *Cg-Gal4*) led  
389 to both a high frequency and number of melanotic masses per animal (Fig. 4A,B,C). In contrast,  
390 knockdown of SMN throughout the larval neuromusculature (using *C15-Gal4*) had no significant  
391 effect (Fig. 4A,C). Thus, the appearance of melanotic masses following depletion of SMN within  
392 immune cells rather than in neurons or muscles suggests that this phenotype is not a  
393 downstream consequence of neuromuscular dysfunction (Asha *et al.* 2003; Jenett *et al.* 2012;  
394 Hoffmann and Reichhart 2002; Ferrandon *et al.* 2007).

395 To ascertain whether melanotic mass formation was a consequence of SMN depletion  
396 within hemocytes, we carried out additional assays using the *Hemolectin-Gal4* (*Hml-Gal4*)  
397 driver. As shown in Fig. 4D and 4E, knockdown of SMN specifically within hemocyte lineages



398 also resulted in formation of larval melanotic masses. Therefore, we conclude that the observed  
399 melanization phenotype in response to SMN loss is derived (at least in part) from cell-  
400 autonomous defects in immune cells.

401

#### 402 **Signaling pathways that regulate SMN-dependent melanization.**

403 To measure the relative contribution of various genes and pathways to the formation of  
404 melanoic masses induced by SMN knockdown, we next carried out a series of genetic modifier  
405 assays (Table S14). Given the results in Fig. 4, and the well-known function of the fat body in  
406 synthesizing and secreting antimicrobial peptides (AMPs) into the hemolymph (Hanson and  
407 Lemaitre 2020), we focused our screening efforts using the *Cg-Gal4* driver to reduce SMN  
408 levels by RNAi and then crossed in various mutations or secondary shRNA transgenes into this  
409 background.

410         The Toll, IMD and TNF (Tumor Necrosis Factor alpha, called Eiger in flies) signaling  
411 pathways use NF- $\kappa$ B transcription factors (*dl*, *Dif* and *Rel*) to turn on AMP genes (Hoffmann and  
412 Reichhart 2002; Lemaitre and Hoffmann 2007; Lindsay and Wasserman 2013; Hanson and  
413 Lemaitre 2020). Based on our multi-omic evidence (Figs. 1 and 2) showing overexpression of  
414 these NF- $\kappa$ B orthologs in our SMA models, we first ingressed heterozygous mutations for *dl* and  
415 *Rel* into the background of *Cg-Gal4/Smn<sup>JF</sup>-RNAi* flies to reduce dosage of these genes and then  
416 scored the resultant progeny for melanotic masses. As shown in Fig. 5A, mutants for *dl* and *Rel*  
417 suppressed the phenotype, reducing the average number of melanotic masses per larva. We  
418 also tested the *dl/Dif* regulatory factor, *cactus*. Contrary to our expectation, reduced dosage of  
419 *cactus* also reduced the number of melanotic masses. Mutations in *cactus* alone can cause  
420 melanotic masses (Minakhina and Steward 2006). However, since *cactus* levels are elevated in  
421 T205I and V72G animals ( $\log_2FC=0.26$ ) and the well-documented autoregulatory feedback loop  
422 for this protein (Nicolas *et al.* 1998), the results of this modifier are inconclusive. Nevertheless,  
423 these data show that reducing gene dosage of downstream targets can suppress the

424 melanization phenotype but throughput for this assay is quite low, often requiring generation of  
425 recombinants, and is limited by the genomic locations and availability of mutations of target  
426 genes.

427 To expand the scope of the investigation, we employed an RNAi-based candidate  
428 approach that couples *Cg-Gal4* mediated knockdown of *Smn* with the co-depletion of other  
429 factors. As a negative control for potential titration of GAL4 (which could reduce the efficacy of  
430 *Smn* knockdown) we co-expressed a UAS:NLS-GFP transgene. As shown in Fig. 5B, co-  
431 expression of a second UAS responder construct had no effect on the number of melanotic  
432 masses in the control larvae. In contrast, co-depletion of *Rel* gave similar results to those  
433 obtained with *Rel* mutants (compare Figs. 5A to 5B).

434 Next, we tested the effects of co-depleting SMN complex proteins and other known  
435 associated factors, see Table S14 for complete list. As shown, knockdown of snRNP  
436 components (SmB, SmD1, SmD2 and SmE) and one SMN complex member, Gemin2 (Gem2),  
437 had little effect on melanotic mass number (Figs. 5B,C). Co-depletion of two other SMN  
438 complex members, Gemin3 (Gem3; Shpargel et al. 2009), Gemin4/Gaulos (Gem4; Matera et al.  
439 2019) and the arginine methyltransferase, Prmt5/dart5/capsuleen (Gonsalvez et al. 2006),  
440 suppressed the melanization phenotype (Fig. 5C). Interestingly, Gem3 and Gem4 were both  
441 previously shown to form complexes in S2 cells with the immune deficiency (*imd*) protein  
442 (Guruharsha et al. 2011), suggesting a potential role for Gemin subcomplexes in immune  
443 signaling. Prmt5 is a notable suppressor not only because knockdown of its corresponding  
444 arginine demethylase (JMJD6) enhanced the number of melanotic masses (Figs. 5B,C), but  
445 also because the Tudor domain of SMN is known to bind to dimethylated targets of Prmt5  
446 (Friesen et al. 2001; Meister et al. 2001; Meister and Fischer 2002). We previously showed that  
447 complete loss of *Drosophila* Prmt5 function has little effect on snRNP assembly or organismal  
448 viability (Gonsalvez et al. 2008). Collectively, these data indicate that the presumptive SMN-  
449 interacting, innate immune signaling target of Prmt5 and JMJD6 is unlikely to be connected to

450 SMN's role in spliceosomal snRNP biogenesis. We therefore sought to test other candidate  
451 signaling factors that interact with SMN.

452 A common feature of the Toll (Toll), IMD (PGRP) and TNF/Eiger (Wengen) signaling  
453 pathways (Fig. 5D) is a protein complex that forms a platform for K63-linked ubiquitylation and  
454 recruitment of downstream factors like Tak1 (TGF- $\beta$  activated kinase 1), Tab2 (TAK1-  
455 associated binding protein 2), and key (kenny, a.k.a. NEMO). Analogous complexes function  
456 within the mammalian TLR (Toll like receptor) and TNF $\alpha$  (Tumor necrosis factor alpha) signaling  
457 cascades (Shen *et al.* 2001; Cha *et al.* 2003; Ma *et al.* 2014; Ding *et al.* 2022). In mammals,  
458 TLR signaling involves the E3 ligase Traf6 (TNF Receptor Associated Factor 6), whereas TNF $\alpha$   
459 signaling utilizes Traf2 (Igaki and Miura 2014; Ma *et al.* 2014; Sharma *et al.* 2021). In flies, a  
460 single protein, called Traf6/dTRAF2 can perform both functions (Shen *et al.* 2001; Kauppila *et*  
461 *al.* 2003). As in humans, fly Traf6 likely interacts with the E2 conjugating enzyme  
462 Ubc13/bendless (Ma *et al.* 2014). Ubc13/bendless and the Ubiquitin-conjugating enzyme variant  
463 1A (Uev1A) activate Tak1, a downstream kinase in the IMD pathway, although Traf6 appears to  
464 be dispensible for this activation, at least in S2 cells (Zhou *et al.* 2005; Chen *et al.* 2017).

465 Intriguingly, human TRAF6 was shown to co-precipitate with SMN (Kim and Choi 2017).  
466 The authors hypothesized that SMN might serve as an negative regulator of NF- $\kappa$ B signaling,  
467 although the effect could be indirect (Kim and Choi 2017). We therefore tested this idea *in vitro*  
468 with purified components, and found that human GST-TRAF6 interacts directly with SMN•Gem2  
469 heterodimer (Fig. S2A). Experiments aimed at determining if this biochemical interaction was  
470 conserved in the fly were inconclusively negative. Transgenic overexpression of Flag-tagged  
471 fruit fly Traf6 (tub-Gal4 > UAS:Flag-Traf6) failed to co-immunoprecipitate endogenous SMN  
472 (Fig. S2B). As measured by western blotting, we also failed to detect *Drosophila* Traf6 in co-  
473 precipitates from embryonic lysates expressing Flag-SMN as the sole source of SMN protein.  
474 However, our previous AP-MS (affinity purification followed by mass spectrometry) analysis of

475 Flag-SMN pulldowns identified the E2 conjugase and Traf6 binding partner, Ubc13/ben (Gray *et*  
476 *al.* 2018).

477           Given that biologically important interactions are not necessarily biochemically stable  
478 enough to withstand a pulldown assay, we decided to test ben and Traf6 by genetic interaction  
479 in the larval melanization assay. As shown in Figs. 5A and 5B, reduction in dosage of either  
480 *Traf6* or *ben* resulted in a significant decrease in the number of melanotic masses per animal,  
481 compared to that of the SMN RNAi-only control. In summary, these observations show that Toll,  
482 IMD, and TNF-Eiger signaling pathways are disrupted following loss of SMN expression within  
483 the immune system (fat body and hemocytes), leading to formation of melanotic masses in fly  
484 models of SMA.

485

486

## 487 **DISCUSSION**

488 Our multi-omic investigation of fly models of SMA supports a role for dysregulated innate  
489 immunity in the peripheral pathophysiology associated with the disease in humans. The  
490 molecular signatures of an activated immune response were readily apparent in the whole-  
491 animal transcriptomes and proteomes of two hypomorphic *Smn* mutants. Moreover, we  
492 observed aberrant immune activation in all SMA models examined, including very mild models  
493 (Fig. 3) that do not display neuromuscular or viability defects in the larval stage (Spring *et al.*  
494 2019). Furthermore, the degree of immune activation, as measured by larval melanotic mass  
495 formation (Fig. 3) correlated well with phenotypic class of the mutations (Spring *et al.* 2019).  
496 That is, Class 2 SMA alleles had the most melanotic masses, Class 4 the fewest, and Class 3  
497 had an intermediate number (Fig. 3B). These results are notably consistent with recent findings  
498 of immune dysregulation in mammalian models of SMA and in pediatric SMA patients (Zhang *et*  
499 *al.* 2013; Deguise and Kothary 2017; Khairallah *et al.* 2017; Thomson *et al.* 2017; Deguise *et al.*  
500 2017; Vukojicic *et al.* 2019; Bonanno *et al.* 2022; Nuzzo *et al.* 2023). Furthermore, our work

501 suggests that this conserved dysregulation of innate signaling is a primary effect of SMN loss in  
502 immune cells and tissues rather than a secondary consequence of SMN loss elsewhere. The  
503 extent to which the dysregulation of immune systems contributes to neuroinflammation and  
504 neuromuscular degeneration in SMA remains to be determined.

505

### 506 **Neurodegeneration and the sustained activation of innate immunity**

507 Emerging evidence suggests that a hyperactivation of innate immunity is a common feature of  
508 neurodegeneration. Our finding that downstream targets of NF- $\kappa$ B proteins are upregulated in  
509 *Smn* hypomorphs is particularly revealing. Overexpression of NF- $\kappa$ B and other innate immune  
510 targets via the cGAS-STING (cyclic GMP-AMP Synthase-Stimulator of Interferon Response  
511 Genes) pathway contributes to disease progression in a mouse model of Alzheimer's disease  
512 (Xie *et al.* 2023). NF- $\kappa$ B-related signaling has been implicated in the pathogenesis of ALS  
513 (Amyotrophic Lateral Sclerosis), also likely involving Toll-like receptors and the cGAS-STING  
514 pathway (Swarup *et al.* 2011; Egawa *et al.* 2012; Zhao *et al.* 2015; Yu *et al.* 2020; Lee and  
515 Woodruff 2021). In agreement with these findings, *Drosophila* models of Alzheimer's disease,  
516 ALS, Ataxia-telangiectasia, and retinal degeneration further suggest that sustained activation of  
517 innate immunity contributes to neurodegeneration (Tan *et al.* 2008; Chinchore *et al.* 2012;  
518 Petersen and Wassarman 2012; Petersen *et al.* 2012; Han *et al.* 2020). During development,  
519 *Drosophila* orthologs of the cGAS-STING pathway function to condition the innate immune  
520 system, but the consequences of sustained activation of this pathway and the potential  
521 contribution to neurodegeneration remain to be determined (Cai *et al.* 2022; Wang *et al.* 2022).

522 In addition to large effects on innate immune signaling, our combinatorial, multi-omic  
523 approach provides insight into more subtle molecular consequences of SMN loss. For example,  
524 the proteome of the V72G mutant displayed altered protein levels for several SMA disease  
525 modifiers: CG17931/Serf, coronin (*coro*), and Zinc finger protein 1 (*Zpr1*), see Table S1 (Scharf  
526 *et al.* 1998; Ahmad *et al.* 2012; Hosseinibarkooie *et al.* 2016; Wirth *et al.* 2017; Zhuri *et al.*

527 2022). The reduction in levels of CG17931, an ortholog of Small EDRK-Rich Factor 1A  
528 (SERF1A/H4F5), are consistent with earlier findings in a different fly *Smn* mutant (Ghosh 2017).  
529 Among these three putative modifiers, Zpr1 is notable for its reported protein-protein interaction  
530 with SMN and snRNP import proteins (Gangwani *et al.* 2001; Narayanan *et al.* 2002). In  
531 addition, the latter two factors have been implicated in R-loop resolution and subsequent DNA-  
532 damage response (Zhao *et al.* 2016; Kannan *et al.* 2019; Cuartas and Gangwani 2022). The  
533 proteomes of both the mild T205I and severe V72G show evidence of a DNA-damage response  
534 (Table S1). In an unrelated study, cytoplasmic R-loop accumulation and DNA-damage response  
535 were recently linked to the activation of innate immunity via the Toll-like receptor and the cGAS-  
536 STING signaling pathways (Crossley *et al.* 2023). Future studies will be required to test the  
537 correlation, noted here, between the proteomic signatures of a DNA-damage response and the  
538 activation of innate immunity in these hypomorphic SMA models.

539

#### 540 **SMN, K63-linked polyubiquitylation and immune signaling networks**

541 In mammals and flies, the TLR/Toll and TNF/IMD signaling pathways function through  
542 analogous enzymatic cascades and complexes. Prominently featured in these pathways are  
543 receptor-proximal adaptor proteins (e.g. RIP1/Imd) that are activated by K63-linked  
544 ubiquitylation (K63-Ub) (Valanne *et al.* 2011; Lindsay and Wasserman 2013; Kietz and  
545 Meinander 2023). The protein complex that carries out these crucial post-translational  
546 modifications includes the E2 conjugating enzymes and cofactors Ubc13/bendless (Ben),  
547 Uev1a, and Ubc5/effete, along with two other RING-domain E3 ligases, Diap2 or Traf6 (see Fig.  
548 5D). The presence of these K63-Ub oligomers triggers binding of Tab2 and key, leading to  
549 activation of the downstream kinase Tak1. Traf6 likely plays both enzymatic and structural roles  
550 in this process (Strickson *et al.* 2017).

551 Tak1 phosphorylation of I-kappaB kinase, mediated by binding Tab2 and key, leads to  
552 translocation of NF-kB transcription factors to the nucleus, and expression of antimicrobial

553 peptide (AMP) genes (Fig. 5D). Traf6, Diap2 and Ben thus constitute an evolutionarily  
554 conserved node or nexus through which multiple intracellular signaling pathways are connected  
555 (Fig. 5D). The work here identifies SMN as a negative regulator of this complex, supported by  
556 both biochemical (Fig. S2A and (Kim and Choi 2017; Gray *et al.* 2018)) and genetic (Figs. 5A-B)  
557 interactions. In summary, we show that partial loss of SMN function (either by mutation or  
558 depletion) results in the sustained activation of innate immunity.

559         Our proteomic analyses of mild and intermediate fly models of SMA reveal clear  
560 signatures of an immune response in the absence of an external challenge. These include, but  
561 are not limited to, overexpression of AMPs (Figs. 1 and 2). Notably, Ganetzky and colleagues  
562 have shown that ectopic expression of individual AMP genes can bypass this immune signaling  
563 cascade and cause disease, as the neural overexpression of AMP transgenes is sufficient to  
564 cause neurodegeneration in the fly brain (Cao *et al.* 2013). Although the precise mechanisms  
565 remain unclear, neuroinflammatory responses like those identified here are likely to contribute to  
566 the pathophysiology of neurodegenerative diseases like Spinal Muscular Atrophy.

567

568



569 **FIGURE LEGENDS**

570 **Figure 1. The proteomes and transcriptomes of *Drosophila Smn* hypomorphs display**  
571 **overlapping evidence for innate immune activation. A)** A rectangular cartoon and an  
572 AlphaFold model of the relative positions of conserved domains of the *Drosophila* SMN protein  
573 and the location of the patient-derived missense mutations used here. **B)** Principal component  
574 analysis of total protein abundances in the *Smn* transgenic lines. *Smn* lines: WT (*Smn*<sup>Tg:WT;X7/X7</sup>);  
575 T205I (*Smn*<sup>Tg:T205I;X7/X7</sup>), Tyrosine (T) to Isoleucine (I); and V72G (*Smn*<sup>Tg:T205I;X7/X7</sup>), Valine (V) to  
576 Glycine (G). **C)** Venn diagram of overlapping protein differences in T205I and V72G relative to  
577 WT. **D)** Volcano plot of protein differences in the T205I line relative to WT. Proteins associated  
578 with innate immunity are indicated by larger dots. **E)** Volcano plot of protein differences in the  
579 V72G line relative to WT, and proteins associated with innate immunity are labeled as in (D).  
580 Dashed vertical bars in (D) and (E) indicate a Log2 FC ratio of +/- 0.58, and the horizontal  
581 dashed line corresponds to q-value = 0.05. **F)** Comparison of T205I proteome (y-axis) with  
582 T205I transcriptome (x-axis). The proteome and transcriptome are relative to the WT genotype.  
583 **G)** Comparison of V72G proteome (y-axis) with V72G transcriptome (x-axis). As in (F), the  
584 proteome and transcriptome are relative to WT. **H)** V72G proteome (y-axis) versus *Smn*<sup>X7/D</sup> null  
585 transcriptome (x-axis). The differential gene expression of the *Smn*<sup>X7/D</sup> transcriptome is relative  
586 to *Oregon-R*.

587

588 **Figure 2. Proteins involved in *Drosophila* humoral and melanization defense responses**  
589 **are elevated in *Smn* mutant proteomes. A)** Gene Ontology (GO) term analysis of protein  
590 differences in V72G. Adjusted p-values (p.adjust) and number of genes per GO term (Count)  
591 are shown at right, which is used to compute a combined score. **B)** Heat maps of select protein  
592 abundance differences from genes within the melanization defense response GO category,  
593 known immune-induced peptides, as well as for the NF-κB transcription factors Dorsal-related  
594 immunity factor (Dif) and dorsal (dl). **C-D)** Heatmap illustrations of TMT-MS data from V72G



595 mutants. Log<sub>2</sub>-fold change (log<sub>2</sub>FC) values (mutant/control) for differentially expressed proteins  
596 are illustrated within the context of the Humoral Immune Response (Wikipathway WP3660, panel  
597 C) or the Melanization Defense Response (panel D) pathway and shaded according to the keys  
598 below each pathway.

599

600 **Figure 3. *Smn* missense mutants exhibit elevated melanotic masses. A-C)** Melanotic mass  
601 (MM) data for wandering third instar larvae expressing *Smn* missense mutations. The data in  
602 each panel are a different measure of the melanotic mass phenotypes of the same set of larvae.  
603 **A)** Percent of larvae with one or more melanotic mass. Individual data points are the percent of  
604 larvae with MMs, 10 larvae per data point. **B)** The average number of melanotic masses per  
605 animal. Data points show the number of MMs in each animal. Number (N) = 50 larvae for each  
606 genotype. **C)** Qualitative size scoring of the largest melanotic mass in each larva. **D)**  
607 Representative images of melanotic masses in animals expressing *Smn* missense mutations.  
608 Bars show the mean, and error bars show standard error of the mean. Asterisks indicate *p*-  
609 values relative to WT: \* < 0.05; \*\* < 0.01; and \*\*\* < 0.001.

610

611 **Figure 4. Targeted RNAi depletion of *Smn* in *Drosophila* immune cells yields melanotic**  
612 **masses and reduced viability. A)** Fraction of larvae that display MMs. RNAi mediated  
613 knockdown of SMN was carried out using the *Drosophila* GAL4/UAS system to drive expression  
614 using UAS-*Smn*<sup>JF</sup> (P{TRiP.JF02057}attP2) together with the following GAL4 drivers: *da*,  
615 *daughterless* (*da*) for ubiquitous knockdown; *C15* (a composite driver that includes *elav*-  
616 (*embryonic lethal abnormal vision*), *sca*- (*scabrous*) and BG57-GAL4 see (Budnik *et al.* 1996;  
617 Brusich *et al.* 2015) for knockdown in both neurons and muscles; and *Cg* (*Collagen 4a1 gap*),  
618 for knockdown in the fat body, hemocytes, and the larval lymph gland. OreR is the control strain.  
619 A plus sign (+) indicates a wild-type chromosome. **B)** Representative image of a wild-type  
620 control and MMs in a larva with SMN depleted in the fat body, hemocytes, and lymph gland (*Cg*-

621 *GAL4>UAS-Smn<sup>JF</sup>*). **C)** Number of MMs per animal with and without SMN depletion, as in (A).  
622 *Smn<sup>HM</sup>* (P{TRiP.HMC03832}attP40) is an alternative UAS RNAi line that targets *Smn*. **D and E)**  
623 Fraction of larvae with MMs (D) and number of MMs per animal (E) using the hemocyte specific  
624 Gal4 driver *Hml* (*Hemolectin*) together with the *UAS-Smn<sup>JF</sup>* transgene. Control strains as per  
625 panel A.

626

627 **Figure 5. Innate immune signaling pathways contribute to MMs upon SMN depletion. A)**

628 Mutations in the IMD and Toll signaling pathways suppress the number of MMs per animal in  
629 *Smn* RNAi lines. Mutation of *Protein Arginine Methyltransferase 5 (PRMT5)* also suppresses  
630 MMs upon depletion of SMN. **B)** Co-depletion of SMN and the indicated RNAi lines for members  
631 of the Toll and IMD pathways, *Jumonji domain containing 6 (JMJD6)*, *Gemin 2 (Gem2)*, and  
632 *refractory to sigma P (ref(2)P)*. **C)** Pie chart of the identified enhancer and suppressors of MMs,  
633 resulting from *Smn* RNAi depletion in the fat body, hemocytes, and lymph gland. **D)** Model  
634 summarizing the role of SMN in the homeostatic regulation of the Toll, TNF and IMD signaling  
635 pathways in *Drosophila* larvae. Bendless (Ben) is an E2 ubiquitin conjugase that functions  
636 together with two different E3 ligases (Traf6 for Wengen/Toll and Diap2 for the PGRP pathway).  
637 The Immune Deficiency protein (Imd) serves not only as an upstream signaling factor, but also  
638 as a downstream target for K63-linked polyubiquitylation via Ben•Diap2. Ben thus sits at a node  
639 that connects several different signalling pathways and its activity is negatively regulated by  
640 SMN. Reduced levels of SMN thereby lead to hyperactivation of downstream targets.

641

642

643 **Supplemental Figure S1. Isoform-specific differences in *Smn* mutants versus controls.**

644 **A)** Volcano plot of differentially expressed transcripts in *Smn* null animals. Transcripts  
645 associated with innate immunity are indicated with red circles and a subset of those are labeled  
646 with transcript symbols for the specific mRNA isoform difference. The axis shown: a Benjamini-

647 Hochberg (False Discovery Rate (FDR) < 0.05) adjusted  $p$ -value (qval) and a Wald test-derived  
648 representation of a normalized fold change (beta factor). **B)** The heat map displays the  
649 respective mean transcripts per million reads for the different genotypes used in (A). The values  
650 are scaled and normalized per row (z-score). The heat map shows approximately half of the  
651 differentially expressed transcripts from (A). **C)** Scatter plot comparison of isoform-specific  
652 protein changes identified in the V72G proteome versus isoform-specific RNA changes found in  
653 the *Smn* null transcriptome. RNA and proteins associated with innate immunity are represented  
654 with bigger dots and labeled.

655

656 **Supplemental Figure S2. Evaluation of protein-protein interactions.**

657 **A)** GST-pulldown experiment using recombinant human GST-TRAF6 and SMN•Gem2. GST  
658 and GST-TRAF6 were expressed in *E.coli* and purified using anti-Glutathione beads. Pulldown  
659 assays were performed and analyzed by western blotting with either anti-hSMN (top) or anti-  
660 GST (bottom) antibodies. As shown, GST-hTRAF6 interacts directly with human SMN•Gem2. **B)**  
661 Flag-pulldown experiment using lysates from tub-Gal4 > UAS:Flag-dTraf6 animals (Flag-Traf6)  
662 or from control animals bearing a *Flag-Smn* transgene (Gray et al. 2018) as the only source of  
663 SMN protein (Flag-SMN). Inputs are on the left and proteins eluted from the Flag beads  
664 following pulldowns are on the right. As shown, Flag-SMN co-purifies with itself in the control  
665 lysates but Flag-Traf6 fails to pull down endogenous dSMN in the experimental cross.

666

666 **REFERENCES**

667  
668

- 669 Adams M. D., S. E. Celniker, R. A. Holt, C. A. Evans, J. D. Gocayne, *et al.*, 2000 The Genome  
670 Sequence of *Drosophila melanogaster*. *Science* 287: 2185–2195.  
671 <https://doi.org/10.1126/science.287.5461.2185>
- 672 Ahmad S., Y. Wang, G. M. Shaik, A. H. Burghes, and L. Gangwani, 2012 The zinc finger  
673 protein ZPR1 is a potential modifier of spinal muscular atrophy. *Hum Mol Genet* 21: 2745–  
674 2758. <https://doi.org/10.1093/hmg/dds102>
- 675 Banerjee U., J. R. Girard, L. M. Goins, and C. M. Spratford, 2019 *Drosophila* as a genetic model  
676 for hematopoiesis. *Genetics* 211: 367–417. <https://doi.org/10.1534/genetics.118.300223>
- 677 Bischof J., R. K. Maeda, M. Hediger, F. Karch, and K. Basler, 2007 An optimized transgenesis  
678 system for *Drosophila* using germ-line-specific  $\phi$ C31 integrases. *Proc National Acad Sci* 104:  
679 3312–3317. <https://doi.org/10.1073/pnas.0611511104>
- 680 Bonanno S., P. Cavalcante, E. Salvi, E. Giagnorio, C. Malacarne, *et al.*, 2022 Identification of a  
681 cytokine profile in serum and cerebrospinal fluid of pediatric and adult spinal muscular  
682 atrophy patients and its modulation upon nusinersen treatment. *Front Cell Neurosci* 16:  
683 982760. <https://doi.org/10.3389/fncel.2022.982760>
- 684 Boulet M., M. Miller, L. Vandel, and L. Waltzer, 2018 From *Drosophila* Blood Cells to Human  
685 Leukemia, pp. 195–214 in *Drosophila Models for Human Diseases*, Advances in  
686 Experimental Medicine and Biology. edited by Yamaguchi M. Springer, Singapore.
- 687 Brahm H., J. Raymackers, A. Union, F. de Keyser, L. Meheus, *et al.*, 2000 The C-terminal RG  
688 Dipeptide Repeats of the Spliceosomal Sm Proteins D1 and D3 Contain Symmetrical  
689 Dimethylarginines, Which Form a Major B-cell Epitope for Anti-Sm Autoantibodies\*. *J Biol*  
690 *Chem* 275: 17122–17129. <https://doi.org/10.1074/jbc.m000300200>
- 691 Brahm H., L. Meheus, V. de Brabandere, U. Fischer, and R. Lührmann, 2001 Symmetrical  
692 dimethylation of arginine residues in spliceosomal Sm protein B/B' and the Sm-like protein  
693 LSm4, and their interaction with the SMN protein. *RNA* 7: 1531–1542.  
694 <https://doi.org/10.1017/s135583820101442x>
- 695 Bray N. L., H. Pimentel, P. Melsted, and L. Pachter, 2016 Near-optimal probabilistic RNA-seq  
696 quantification. *Nat Biotechnol* 34: 525–527. <https://doi.org/10.1038/nbt.3519>
- 697 Brusich D. J., A. M. Spring, and C. A. Frank, 2015 A single-cross, RNA interference-based  
698 genetic tool for examining the long-term maintenance of homeostatic plasticity. *Front. Cell.*  
699 *Neurosci.* 9: 107. <https://doi.org/10.3389/fncel.2015.00107>

- 700 Budnik V., Y.-H. Koh, B. Guan, B. Hartmann, C. Hough, *et al.*, 1996 Regulation of Synapse  
701 Structure and Function by the Drosophila Tumor Suppressor Gene *dlg*. *Neuron* 17: 627–640.  
702 [https://doi.org/10.1016/s0896-6273\(00\)80196-8](https://doi.org/10.1016/s0896-6273(00)80196-8)
- 703 Burghes A. H. M., C. J. DiDonato, V. L. McGovern, and W. D. Arnold, 2017 Chapter 15:  
704 Mammalian Models of Spinal Muscular Atrophy, pp. 241–260 in *Spinal Muscular Atrophy:*  
705 *Disease Mechanisms and Therapy*, edited by Sumner C. J., Paushkin S., Ko C.-P. Academic  
706 Press, New York.
- 707 Cai H., C. Meignin, and J.-L. Imler, 2022 cGAS-like receptor-mediated immunity: the insect  
708 perspective. *Curr Opin Immunol* 74: 183–189. <https://doi.org/10.1016/j.coi.2022.01.005>
- 709 Cao Y., S. Chtarbanova, A. J. Petersen, and B. Ganetzky, 2013 Dnr1 mutations cause  
710 neurodegeneration in Drosophila by activating the innate immune response in the brain.  
711 *Proceedings of the National Academy of Sciences* 110: E1752-60.  
712 <https://doi.org/10.1073/pnas.1306220110>
- 713 Cha G.-H., K. S. Cho, J. H. Lee, M. Kim, E. Kim, *et al.*, 2003 Discrete Functions of TRAF1 and  
714 TRAF2 in Drosophila melanogaster Mediated by c-Jun N-Terminal Kinase and NF- $\kappa$ B-  
715 Dependent Signaling Pathways. *Mol Cell Biol* 23: 7982–7991.  
716 <https://doi.org/10.1128/mcb.23.22.7982-7991.2003>
- 717 Chan Y. B., I. Miguel-Aliaga, C. Franks, N. Thomas, B. Trulzsch, *et al.*, 2003 Neuromuscular  
718 defects in a Drosophila survival motor neuron gene mutant. *Hum Mol Genet* 12: 1367–1376.  
719 <https://doi.org/10.1093/hmg/ddg157>
- 720 Chang H. C.-H., D. N. Dimlich, T. Yokokura, A. Mukherjee, M. W. Kankel, *et al.*, 2008  
721 Modeling Spinal Muscular Atrophy in Drosophila. *PLoS One* 3: e3209.  
722 <https://doi.org/10.1371/journal.pone.0003209>
- 723 Chen E. Y., C. M. Tan, Y. Kou, Q. Duan, Z. Wang, *et al.*, 2013 Enrichr: interactive and  
724 collaborative HTML5 gene list enrichment analysis tool. *Bmc Bioinformatics* 14: 128.  
725 <https://doi.org/10.1186/1471-2105-14-128>
- 726 Chen L., N. Paquette, S. Mamoor, F. Rus, A. Nandy, *et al.*, 2017 Innate immune signaling in  
727 Drosophila is regulated by transforming growth factor  $\beta$  (TGF $\beta$ )-activated kinase (Tak1)-  
728 triggered ubiquitin editing. *J Biol Chem* 292: 8738–8749.  
729 <https://doi.org/10.1074/jbc.m117.788158>
- 730 Chinchore Y., G. F. Gerber, and P. J. Dolph, 2012 Alternative pathway of cell death in  
731 Drosophila mediated by NF- $\kappa$ B transcription factor Relish. *Proc National Acad Sci* 109:  
732 E605–E612. <https://doi.org/10.1073/pnas.1110666109>
- 733 Crossley M. P., C. Song, M. J. Bocek, J.-H. Choi, J. Kousorous, *et al.*, 2023 R-loop-derived  
734 cytoplasmic RNA–DNA hybrids activate an immune response. *Nature* 613: 187–194.  
735 <https://doi.org/10.1038/s41586-022-05545-9>

- 736 Cuartas J., and L. Gangwani, 2022 R-loop mediated DNA damage and impaired DNA repair in  
737 Spinal Muscular Atrophy. *Front Cell Neurosci* 16: 826608.  
738 <https://doi.org/10.3389/fncel.2022.826608>
- 739 Darras B. T., and R. S. Finkel, 2017 Chapter 25: Natural History of Spinal Muscular Atrophy,  
740 pp. 399–421 in *Spinal Muscular Atrophy: Disease Mechanisms and Therapy*, edited by  
741 Sumner C. J., Paushkin S., Ko C.-P. Academic Press, New York.
- 742 Deguise M., and R. Kothary, 2017 New insights into SMA pathogenesis: immune dysfunction  
743 and neuroinflammation. *Ann Clin Transl Neur* 4: 522–530. <https://doi.org/10.1002/acn3.423>
- 744 Deguise M.-O., Y. D. Repentigny, E. McFall, N. Auclair, S. Sad, *et al.*, 2017 Immune  
745 dysregulation may contribute to disease pathogenesis in spinal muscular atrophy mice.  
746 *Human Molecular Genetics* 26: 801–819. <https://doi.org/10.1093/hmg/ddw434>
- 747 Dimitriadi M., J. N. Sleight, A. Walker, H. C. Chang, A. Sen, *et al.*, 2010 Conserved Genes Act  
748 as Modifiers of Invertebrate SMN Loss of Function Defects. *PLoS Genet.* 6: e1001172.  
749 <https://doi.org/10.1371/journal.pgen.1001172>
- 750 Ding X., Z. Li, G. Lin, W. Li, and L. Xue, 2022 Toll-7 promotes tumour growth and invasion in  
751 *Drosophila*. *Cell Proliferat* 55: e13188. <https://doi.org/10.1111/cpr.13188>
- 752 Dubowitz V., 2017 Sixty Years of Spinal Muscular Atrophy: A Personal Odyssey, pp. xvii–xxi  
753 in *Spinal Muscular Atrophy: Disease Mechanisms and Therapy*, edited by Sumner C. J.,  
754 Paushkin S., Ko C.-P. Academic Press, New York.
- 755 Egawa N., S. Kitaoka, K. Tsukita, M. Naitoh, K. Takahashi, *et al.*, 2012 Drug Screening for ALS  
756 Using Patient-Specific Induced Pluripotent Stem Cells. *Sci Transl Med* 4: 145ra104.  
757 <https://doi.org/10.1126/scitranslmed.3004052>
- 758 Ferrandon D., J.-L. Imler, C. Hetru, and J. A. Hoffmann, 2007 The *Drosophila* systemic immune  
759 response: sensing and signalling during bacterial and fungal infections. *Nature Reviews*  
760 *Immunology* 7: 862–874. <https://doi.org/10.1038/nri2194>
- 761 Friesen W. J., S. Massenet, S. Paushkin, A. Wyce, and G. Dreyfuss, 2001 SMN, the Product of  
762 the Spinal Muscular Atrophy Gene, Binds Preferentially to Dimethylarginine-Containing  
763 Protein Targets. *Mol. Cell* 7: 1111–1117. [https://doi.org/10.1016/s1097-2765\(01\)00244-1](https://doi.org/10.1016/s1097-2765(01)00244-1)
- 764 Gangwani L., M. Mikrut, S. Theroux, M. Sharma, and R. J. Davis, 2001 Spinal muscular atrophy  
765 disrupts the interaction of ZPR1 with the SMN protein. *Nat Cell Biol* 3: 376–383.  
766 <https://doi.org/10.1038/35070059>
- 767 Garcia E. L., Z. Lu, M. P. Meers, K. Praveen, and A. G. Matera, 2013 Developmental arrest of  
768 *Drosophila* survival motor neuron (Smn) mutants accounts for differences in expression of  
769 minor intron-containing genes. *RNA* 19: 1510–1516. <https://doi.org/10.1261/rna.038919.113>



- 770 Garcia E. L., Y. Wen, K. Praveen, and A. G. Matera, 2016 Transcriptomic comparison of  
771 *Drosophila* snRNP biogenesis mutants reveals mutant-specific changes in pre-mRNA  
772 processing: implications for spinal muscular atrophy. *RNA* 22: 1215–1227.  
773 <https://doi.org/10.1261/rna.057208.116>
- 774 Garcia E. L., 2022 Allele-specific alternative splicing of *Drosophila* Ribosomal protein S21  
775 suppresses a lethal mutation in the Phosphorylated adaptor for RNA export (Phax) gene. *G3*  
776 *Genes Genomes Genetics* 12: jkac195. <https://doi.org/10.1093/g3journal/jkac195>
- 777 Ghosh S., 2017 Genetic analysis of Serf gene function in *Drosophila melanogaster* and its  
778 contribution to a fly model of Spinal Muscular Atrophy. Theses and Dissertations--Biology.  
779 39. [https://uknowledge.uky.edu/biology\\_etds/39/](https://uknowledge.uky.edu/biology_etds/39/).
- 780 Gold K. S., and K. Brückner, 2015 Macrophages and cellular immunity in *Drosophila*  
781 *melanogaster*. *Semin Immunol* 27: 357–368. <https://doi.org/10.1016/j.smim.2016.03.010>
- 782 Gonsalvez G. B., Rajendra T. K., Tian L. and Matera A. G., 2006. The Sm-protein  
783 methyltransferase, Dart5, is essential for germ cell specification and maintenance. *Current*  
784 *Biology* 16: 1077-1089. <https://doi.org/10.1016/j.cub.2006.04.037>
- 785 Gonsalvez G. B., K. Praveen, A. J. Hicks, L. Tian, and A. G. Matera, 2008 Sm protein  
786 methylation is dispensable for snRNP assembly in *Drosophila melanogaster*. *RNA* 14: 878–  
787 887. <https://doi.org/10.1261/rna.940708>
- 788 Gray K. M., K. A. Kaifer, D. Baillat, Y. Wen, T. R. Bonacci, *et al.*, 2018 Self-oligomerization  
789 regulates stability of survival motor neuron protein isoforms by sequestering an SCFS<sup>lmb</sup>  
790 degnon., (Y. Yamashita, Ed.). *Molecular Biology of the Cell* 29: 96–110.  
791 <https://doi.org/10.1091/mbc.e17-11-0627>
- 792 Gupta K., Y. Wen, N. S. Ninan, A. C. Raimer, R. Sharp, *et al.*, 2021 Assembly of higher-order  
793 SMN oligomers is essential for metazoan viability and requires an exposed structural motif  
794 present in the YG zipper dimer. *Nucleic Acids Res* 49: 7644–7664.  
795 <https://doi.org/10.1093/nar/gkab508>
- 796 Guruharsha K. G., J.-F. Rual, B. Zhai, J. Mintseris, P. Vaidya, *et al.*, 2011 A Protein Complex  
797 Network of *Drosophila melanogaster*. *Cell* 147: 690–703.  
798 <https://doi.org/10.1016/j.cell.2011.08.047>
- 799 Han M. H., M. J. Kwon, B. S. Ko, D. Y. Hyeon, D. Lee, *et al.*, 2020 NF- $\kappa$ B disinhibition  
800 contributes to dendrite defects in fly models of neurodegenerative diseases. *J Cell Biol* 219:  
801 e202004107. <https://doi.org/10.1083/jcb.202004107>
- 802 Hanson M. A., and B. Lemaitre, 2020 New insights on *Drosophila* antimicrobial peptide function  
803 in host defense and beyond. *Curr. Opin. Immunol.* 62: 22–30.  
804 <https://doi.org/10.1016/j.coi.2019.11.008>

- 805 Hanson M. A., L. B. Cohen, A. Marra, I. Iatsenko, S. A. Wasserman, *et al.*, 2021 The *Drosophila*  
806 Baramicin polypeptide gene protects against fungal infection. *Plos Pathog* 17: e1009846.  
807 <https://doi.org/10.1371/journal.ppat.1009846>
- 808 Hanson M. A., and B. Lemaitre, 2022 Repeated truncation of a modular antimicrobial peptide  
809 gene for neural context. *Plos Genet* 18: e1010259.  
810 <https://doi.org/10.1371/journal.pgen.1010259>
- 811 Hoffmann J. A., and J.-M. Reichhart, 2002 *Drosophila* innate immunity: an evolutionary  
812 perspective. *Nat Immunol* 3: 121–126. <https://doi.org/10.1038/ni0202-121>
- 813 Hosseinibarkooie S., M. Peters, L. Torres-Benito, R. H. Rastetter, K. Hupperich, *et al.*, 2016 The  
814 Power of Human Protective Modifiers: PLS3 and CORO1C Unravel Impaired Endocytosis in  
815 Spinal Muscular Atrophy and Rescue SMA Phenotype. *Am J Hum Genetics* 99: 647–665.  
816 <https://doi.org/10.1016/j.ajhg.2016.07.014>
- 817 Igaki T., and M. Miura, 2014 The *Drosophila* TNF ortholog Eiger: Emerging physiological roles  
818 and evolution of the TNF system. *Semin Immunol* 26: 267–274.  
819 <https://doi.org/10.1016/j.smim.2014.05.003>
- 820 Imlach W. L., E. S. Beck, B. J. Choi, F. Lotti, L. Pellizzoni, *et al.*, 2012 SMN is required for  
821 sensory-motor circuit function in *Drosophila*. *Cell* 151: 427–439.  
822 <https://doi.org/10.1016/j.cell.2012.09.011>
- 823 Kannan A., X. Jiang, L. He, S. Ahmad, and L. Gangwani, 2019 ZPR1 prevents R-loop  
824 accumulation, upregulates SMN2 expression and rescues spinal muscular atrophy. *Brain* 143:  
825 69–93. <https://doi.org/10.1093/brain/awz373>
- 826 Kauppila S., W. S. A. Maaty, P. Chen, R. S. Tomar, M. T. Eby, *et al.*, 2003 Eiger and its  
827 receptor, Wengen, comprise a TNF-like system in *Drosophila*. *Oncogene* 22: 4860–4867.  
828 <https://doi.org/10.1038/sj.onc.1206715>
- 829 Khairallah M.-T., J. Astroski, S. K. Custer, E. J. Androphy, C. L. Franklin, *et al.*, 2017 SMN  
830 deficiency negatively impacts red pulp macrophages and spleen development in mouse  
831 models of Spinal Muscular Atrophy. *Hum Mol Genet* 26: ddx008.  
832 <https://doi.org/10.1093/hmg/ddx008>
- 833 Kietz C., and A. Meinander, 2023 *Drosophila* caspases as guardians of host-microbe interactions.  
834 *Cell Death Differ.* 30: 227–236. <https://doi.org/10.1038/s41418-022-01038-4>
- 835 Kim E. K., and E.-J. Choi, 2017 SMN1 functions as a novel inhibitor for TRAF6-mediated NF-  
836  $\kappa$ B signaling. *Biochimica Et Biophysica Acta Bba - Mol Cell Res* 1864: 760–770.  
837 <https://doi.org/10.1016/j.bbamcr.2017.02.011>



- 838 Kim D., J. M. Paggi, C. Park, C. Bennett, and S. L. Salzberg, 2019 Graph-based genome  
839 alignment and genotyping with HISAT2 and HISAT-genotype. *Nat Biotechnol* 37: 907–915.  
840 <https://doi.org/10.1038/s41587-019-0201-4>
- 841 Kugelberg E., and L. Welander, 1956 Heredofamilial Juvenile muscular Atrophy Simulating  
842 muscular Dystrophy. *AMA Arch. Neurol. Psychiatry* 75: 500–509.  
843 <https://doi.org/10.1001/archneurpsyc.1956.02330230050005>
- 844 Kuleshov M. V., M. R. Jones, A. D. Rouillard, N. F. Fernandez, Q. Duan, *et al.*, 2016 Enrichr: a  
845 comprehensive gene set enrichment analysis web server 2016 update. *Nucleic Acids Res* 44:  
846 W90–W97. <https://doi.org/10.1093/nar/gkw377>
- 847 Lee J. D., and T. M. Woodruff, 2021 TDP-43 Puts the STING in ALS. *Trends Neurosci* 44: 81–  
848 82. <https://doi.org/10.1016/j.tins.2020.12.001>
- 849 Lefebvre S., L. Bürglen, S. Reboullet, O. Clermont, P. Burlet, *et al.*, 1995 Identification and  
850 characterization of a spinal muscular atrophy-determining gene. *Cell* 80: 155–165.  
851 [https://doi.org/10.1016/0092-8674\(95\)90460-3](https://doi.org/10.1016/0092-8674(95)90460-3)
- 852 Lefebvre S., P. Burlet, Q. Liu, S. Bertrand, O. Clermont, *et al.*, 1997 Correlation between  
853 severity and SMN protein level in spinal muscular atrophy. *Nat Genet* 16: 265–269.  
854 <https://doi.org/10.1038/ng0797-265>
- 855 Lemaitre B., and J. Hoffmann, 2007 The Host Defense of *Drosophila melanogaster*. *Annual*  
856 *Review of Immunology* 25: 697–743.  
857 <https://doi.org/10.1146/annurev.immunol.25.022106.141615>
- 858 Lindsay S. A., and S. A. Wasserman, 2013 Conventional and non-conventional *Drosophila* Toll  
859 signaling. *Developmental and Comparative Immunology* 1–9.  
860 <https://doi.org/10.1016/j.dci.2013.04.011>
- 861 Liu Q., U. Fischer, F. Wang, and G. Dreyfuss, 1997 The Spinal Muscular Atrophy Disease Gene  
862 Product, SMN, and Its Associated Protein SIP1 Are in a Complex with Spliceosomal snRNP  
863 Proteins. *Cell* 90: 1013–1021. [https://doi.org/10.1016/s0092-8674\(00\)80367-0](https://doi.org/10.1016/s0092-8674(00)80367-0)
- 864 Lorson C. L., J. Strasswimmer, J.-M. Yao, J. D. Baleja, E. Hahnen, *et al.*, 1998 SMN  
865 oligomerization defect correlates with spinal muscular atrophy severity. *Nat Genet* 19: 63–66.  
866 <https://doi.org/10.1038/ng0598-63>
- 867 Love M. I., W. Huber, and S. Anders, 2014 Moderated estimation of fold change and dispersion  
868 for RNA-seq data with DESeq2. *Genome Biol* 15: 550. [https://doi.org/10.1186/s13059-014-](https://doi.org/10.1186/s13059-014-0550-8)  
869 [0550-8](https://doi.org/10.1186/s13059-014-0550-8)
- 870 Ma X., W. Li, H. Yu, Y. Yang, M. Li, *et al.*, 2014 Bendless modulates JNK-mediated cell death  
871 and migration in *Drosophila*. *Cell Death Differ* 21: 407–415.  
872 <https://doi.org/10.1038/cdd.2013.154>

- 873 Martin R., K. Gupta, N. S. Ninan, K. Perry, and G. D. Van Duyne, 2012 The Survival Motor  
874 Neuron Protein Forms Soluble Glycine Zipper Oligomers. *Structure* 20: 1929–1939.  
875 <https://doi.org/10.1016/j.str.2012.08.024>
- 876 Matera A. G., and Z. Wang, 2014 A day in the life of the spliceosome. *Nat Rev Mol Cell Biol*  
877 15: 108–121. <https://doi.org/10.1038/nrm3742>
- 878 Matera A. G., Raimer A. C., Schmidt C. A., Kelly J. A., Droby G. N., Baillat D., ten Have S.,  
879 Lamond A. I., Wagner E. J. and Gray K. M., 2019. Composition of the Survival Motor  
880 Neuron (SMN) complex in *Drosophila melanogaster*. *G3: Genes, Genomes, Genetics* 9: 491–  
881 503. <https://doi.org/10.1534/g3.118.200874>
- 882 McAlister G. C., D. P. Nusinow, M. P. Jedrychowski, M. Wühr, E. L. Huttlin, *et al.*, 2014  
883 MultiNotch MS3 Enables Accurate, Sensitive, and Multiplexed Detection of Differential  
884 Expression across Cancer Cell Line Proteomes. *Anal. Chem.* 86: 7150–7158.  
885 <https://doi.org/10.1021/ac502040v>
- 886 Meister G., C. Eggert, D. Bühler, H. Brahms, C. Kambach, *et al.*, 2001 Methylation of Sm  
887 proteins by a complex containing PRMT5 and the putative U snRNP assembly factor pICln.  
888 *Curr. Biol.* 11: 1990–1994. [https://doi.org/10.1016/s0960-9822\(01\)00592-9](https://doi.org/10.1016/s0960-9822(01)00592-9)
- 889 Meister G., and U. Fischer, 2002 Assisted RNP assembly: SMN and PRMT5 complexes  
890 cooperate in the formation of spliceosomal UsnRNPs. *EMBO J.* 21: 5853–5863.  
891 <https://doi.org/10.1093/emboj/cdf585>
- 892 Mertins P., L. C. Tang, K. Krug, D. J. Clark, M. A. Gritsenko, *et al.*, 2018 Reproducible  
893 workflow for multiplexed deep-scale proteome and phosphoproteome analysis of tumor  
894 tissues by liquid chromatography–mass spectrometry. *Nat. Protoc.* 13: 1632–1661.  
895 <https://doi.org/10.1038/s41596-018-0006-9>
- 896 Minakhina S., and R. Steward, 2006 Melanotic Mutants in *Drosophila*: Pathways and  
897 Phenotypes. *Genetics* 174: 253–263. <https://doi.org/10.1534/genetics.106.061978>
- 898 Narayanan U., J. K. Ospina, M. R. Frey, M. D. Hebert, and A. G. Matera, 2002 SMN, the spinal  
899 muscular atrophy protein, forms a pre-import snRNP complex with snurportin1 and importin  
900  $\beta$ . *Hum Mol Genet* 11: 1785–1795. <https://doi.org/10.1093/hmg/11.15.1785>
- 901 Nicolas E., J. M. Reichhart, J. A. Hoffmann, and B. Lemaître, 1998 In Vivo Regulation of the  
902  $\kappa$ B Homologue cactus during the Immune Response of *Drosophila* \*. *J. Biol. Chem.* 273:  
903 10463–10469. <https://doi.org/10.1074/jbc.273.17.10463>
- 904 Nuzzo T., R. Russo, F. Errico, A. D’Amico, A. G. Tewelde, *et al.*, 2023 Nusinersen mitigates  
905 neuroinflammation in severe spinal muscular atrophy patients. *Commun Medicine* 3: 28.  
906 <https://doi.org/10.1038/s43856-023-00256-2>

- 907 O'Hern P., E. L. Garcia, L. T. Hao, A. C. Hart, A. G. Matera, *et al.*, 2017 Nonmammalian  
908 Animal Models of Spinal Muscular Atrophy, pp. 221–239 in *Spinal Muscular Atrophy:*  
909 *Disease mechanisms and therapy.* Elsevier.
- 910 Ohno M., A. Segref, A. Bachi, M. Wilm, and I. W. Mattaj, 2000 PHAX, a mediator of U snRNA  
911 nuclear export whose activity is regulated by phosphorylation. *Cell* 101: 187–198.  
912 [https://doi.org/10.1016/s0092-8674\(00\)80829-6](https://doi.org/10.1016/s0092-8674(00)80829-6)
- 913 Oskoui M., B. T. Darras, and D. C. D. Vivo, 2017 Chapter 1: Spinal Muscular Atrophy: 125  
914 Years Later and on the Verge of a Cure, pp. 3–19 in *Spinal Muscular Atrophy: Disease*  
915 *Mechanisms and Therapy*, edited by Sumner C. J., Paushkin S., Ko C.-P. Academic Press,  
916 New York.
- 917 Perez-Riverol Y., J. Bai, C. Bandla, S. Hewapathirana, D. García-Seisdedos, *et al.*, 2022. The  
918 PRIDE database resources in 2022: A Hub for mass spectrometry-based proteomics  
919 evidences. *Nucleic Acids Res* 50(D1):D543-D552. <https://doi.org/10.1093/nar/gkab1038>
- 920 Perkins L. A., L. Holderbaum, R. Tao, Y. Hu, R. Sopko, *et al.*, 2015 The Transgenic RNAi  
921 Project at Harvard Medical School: Resources and Validation. *Genetics* 201: 843–852.  
922 <https://doi.org/10.1534/genetics.115.180208>
- 923 Pertea M., G. M. Pertea, C. M. Antonescu, T.-C. Chang, J. T. Mendell, *et al.*, 2015 StringTie  
924 enables improved reconstruction of a transcriptome from RNA-seq reads. *Nat Biotechnol* 33:  
925 290–295. <https://doi.org/10.1038/nbt.3122>
- 926 Pertea M., D. Kim, G. M. Pertea, J. T. Leek, and S. L. Salzberg, 2016 Transcript-level  
927 expression analysis of RNA-seq experiments with HISAT, StringTie and Ballgown. *Nat*  
928 *Protoc* 11: 1650–1667. <https://doi.org/10.1038/nprot.2016.095>
- 929 Petersen A. J., S. A. Rimkus, and D. A. Wassarman, 2012 ATM kinase inhibition in glial cells  
930 activates the innate immune response and causes neurodegeneration in *Drosophila*. *Proc*  
931 *National Acad Sci* 109: E656–E664. <https://doi.org/10.1073/pnas.1110470109>
- 932 Petersen A. J., and D. A. Wassarman, 2012 *Drosophila* innate immune response pathways  
933 moonlight in neurodegeneration. *Fly* 6: 169–172. <https://doi.org/10.4161/fly.20999>
- 934 Pimentel H., N. L. Bray, S. Puente, P. Melsted, and L. Pachter, 2017 Differential analysis of  
935 RNA-seq incorporating quantification uncertainty. *Nat Methods* 14: 687–690.  
936 <https://doi.org/10.1038/nmeth.4324>
- 937 Praveen K., Y. Wen, and A. G. Matera, 2012 A *Drosophila* model of Spinal Muscular Atrophy  
938 uncouples snRNP biogenesis functions of survival motor neuron from locomotion and  
939 viability defects. *Cell Reports* 1: 624–631. <https://doi.org/10.1016/j.celrep.2012.05.014>

- 940 Praveen K., Y. Wen, K. M. Gray, J. J. Noto, A. R. Patlolla, *et al.*, 2014 SMA-causing missense  
941 mutations in survival motor neuron (Smn) display a wide range of phenotypes when modeled  
942 in *Drosophila*. PLoS Genet. 10: e1004489. <https://doi.org/10.1371/journal.pgen.1004489>
- 943 Raimer A. C., K. M. Gray, and A. G. Matera, 2017 SMN - A chaperone for nuclear RNP social  
944 occasions? Rna Biol 14: 701–711. <https://doi.org/10.1080/15476286.2016.1236168>
- 945 Raimer A. C., S. S. Singh, M. R. Edula, T. Paris-Davila, V. Vandadi, *et al.*, 2020 Temperature-  
946 sensitive spinal muscular atrophy-causing point mutations lead to SMN instability, locomotor  
947 defects and premature lethality in *Drosophila*. Dis Model Mech 13: dmm043307.  
948 <https://doi.org/10.1242/dmm.043307>
- 949 Rajendra T. K., G. B. Gonsalvez, M. P. Walker, K. B. Shpargel, H. K. Salz, *et al.*, 2007 A  
950 *Drosophila melanogaster* model of Spinal Muscular Atrophy reveals a function for SMN in  
951 striated muscle. J Cell Biol 176: 831–841. <https://doi.org/10.1083/jcb.200610053>
- 952 Scharf J. M., M. G. Endrizzi, A. Wetter, S. Huang, T. G. Thompson, *et al.*, 1998 Identification of  
953 a candidate modifying gene for spinal muscular atrophy by comparative genomics. Nat Genet  
954 20: 83–86. <https://doi.org/10.1038/1753>
- 955 Sharma V., M. Mutsuddi, and A. Mukherjee, 2021 Deltex cooperates with TRAF6 to promote  
956 apoptosis and cell migration through Eiger-independent JNK activation in *Drosophila*. Cell.  
957 Biol. Int. 45: 686–700. <https://doi.org/10.1002/cbin.11521>
- 958 Shen B., H. Liu, E. Y. Skolnik, and J. L. Manley, 2001 Physical and functional interactions  
959 between *Drosophila* TRAF2 and Pelle kinase contribute to Dorsal activation. Proc National  
960 Acad Sci 98: 8596–8601. <https://doi.org/10.1073/pnas.141235698>
- 961 Shpargel K. B., Praveen K., Rajendra T. K. and Matera A. G., 2009. Gemin3 is an essential gene  
962 required for larval motor function and pupation in *Drosophila*. Mol Biol Cell 20: 90-101.  
963 <https://doi.org/10.1091/mbc.e08-01-0024>
- 964 Singh N. N., S. Hoffman, P. P. Reddi, and R. N. Singh, 2021 Spinal muscular atrophy: Broad  
965 disease spectrum and sex-specific phenotypes. Biochimica Et Biophysica Acta Bba - Mol  
966 Basis Dis 1867: 166063. <https://doi.org/10.1016/j.bbadis.2020.166063>
- 967 Spring A. M., A. C. Raimer, C. D. Hamilton, M. J. Schillinger, and A. G. Matera, 2019  
968 Comprehensive Modeling of Spinal Muscular Atrophy in *Drosophila melanogaster*. Front  
969 Mol Neurosci 12: 113. <https://doi.org/10.3389/fnmol.2019.00113>
- 970 Strickson S., C. H. Emmerich, E. T. H. Goh, J. Zhang, I. R. Kelsall, *et al.*, 2017 Roles of the  
971 TRAF6 and Pellino E3 ligases in MyD88 and RANKL signaling. Proc. Natl. Acad. Sci. 114:  
972 E3481–E3489. <https://doi.org/10.1073/pnas.1702367114>

- 973 Swarup V., D. Phaneuf, N. Dupré, S. Petri, M. Strong, *et al.*, 2011 Deregulation of TDP-43 in  
974 amyotrophic lateral sclerosis triggers nuclear factor  $\kappa$ B-mediated pathogenic pathways. *J Exp*  
975 *Med* 208: 2429–2447. <https://doi.org/10.1084/jem.20111313>
- 976 Talbot K., C. P. Ponting, A. M. Theodosiou, N. R. Rodrigues, R. Surtees, *et al.*, 1997 Missense  
977 mutation clustering in the survival motor neuron gene: a role for a conserved tyrosine and  
978 glycine rich region of the protein in RNA metabolism? *Hum Mol Genet* 6: 497–500.  
979 <https://doi.org/10.1093/hmg/6.3.497>
- 980 Tan L., P. Schedl, H.-J. Song, D. Garza, and M. Konsolaki, 2008 The Toll→NF $\kappa$ B Signaling  
981 Pathway Mediates the Neuropathological Effects of the Human Alzheimer’s A $\beta$ 42  
982 Polypeptide in *Drosophila*. *Plos One* 3: e3966. <https://doi.org/10.1371/journal.pone.0003966>
- 983 Thomson A. K., E. Somers, R. A. Powis, H. K. Shorrocks, K. Murphy, *et al.*, 2017 Survival of  
984 motor neurone protein is required for normal postnatal development of the spleen. *J Anat* 230:  
985 337–346. <https://doi.org/10.1111/joa.12546>
- 986 Valanne S., J. H. Wang, and M. Ramet, 2011 The *Drosophila* Toll Signaling Pathway. *The*  
987 *Journal of Immunology* 186: 649–656. <https://doi.org/10.4049/jimmunol.1002302>
- 988 Vukojicic A., N. Delestrée, E. V. Fletcher, J. G. Pagiazitis, S. Sankaranarayanan, *et al.*, 2019 The  
989 Classical Complement Pathway Mediates Microglia-Dependent Remodeling of Spinal Motor  
990 Circuits during Development and in SMA. *Cell Reports* 29: 3087-3100.e7.  
991 <https://doi.org/10.1016/j.celrep.2019.11.013>
- 992 Wang L., L. Tracy, W. Su, F. Yang, Y. Feng, *et al.*, 2022 Retrotransposon activation during  
993 *Drosophila* metamorphosis conditions adult antiviral responses. *Nat Genet* 54: 1933–1945.  
994 <https://doi.org/10.1038/s41588-022-01214-9>
- 995 Williams M. J., 2007 *Drosophila* hemopoiesis and cellular immunity. *The Journal of*  
996 *Immunology* 178: 4711–4716. <https://doi.org/10.4049/jimmunol.178.8.4711>
- 997 Wirth B., N. Mendoza-Ferreira, and L. Torres-Benito, 2017 Chapter 12: Spinal Muscular  
998 Atrophy Disease Modifiers, pp. 191–210 in *Spinal Muscular Atrophy: Disease Mechanisms*  
999 *and Therapy*, edited by Sumner C. J., Paushkin S., Ko C.-P. Academic Press, New York.
- 1000 Xie X., G. Ma, X. Li, J. Zhao, Z. Zhao, *et al.*, 2023 Activation of innate immune cGAS-STING  
1001 pathway contributes to Alzheimer’s pathogenesis in 5 $\times$ FAD mice. *Nat Aging* 3: 202–212.  
1002 <https://doi.org/10.1038/s43587-022-00337-2>
- 1003 Yu C.-H., S. Davidson, C. R. Harapas, J. B. Hilton, M. J. Mlodzianoski, *et al.*, 2020 TDP-43  
1004 Triggers Mitochondrial DNA Release via mPTP to Activate cGAS/STING in ALS. *Cell* 183:  
1005 636-649.e18. <https://doi.org/10.1016/j.cell.2020.09.020>
- 1006 Zhang Z., A. M. Pinto, L. Wan, W. Wang, M. G. Berg, *et al.*, 2013 Dysregulation of  
1007 synaptogenesis genes antecedes motor neuron pathology in Spinal Muscular Atrophy.

- 1008 Proceedings of the National Academy of Sciences of the United States of America 110:  
1009 19348–19353. <https://doi.org/10.1073/pnas.1319280110>
- 1010 Zhao W., D. R. Beers, S. Bell, J. Wang, S. Wen, *et al.*, 2015 TDP-43 activates microglia through  
1011 NF- $\kappa$ B and NLRP3 inflammasome. *Exp Neurol* 273: 24–35.  
1012 <https://doi.org/10.1016/j.expneurol.2015.07.019>
- 1013 Zhao D. Y., G. Gish, U. Braunschweig, Y. Li, Z. Ni, *et al.*, 2016 SMN and symmetric arginine  
1014 dimethylation of RNA polymerase II C-terminal domain control termination. *Nature* 529: 48–  
1015 53. <https://doi.org/10.1038/nature16469>
- 1016 Zhou R., N. Silverman, M. Hong, D. S. Liao, Y. Chung, *et al.*, 2005 The Role of Ubiquitination  
1017 in *Drosophila* Innate Immunity\*. *J Biol Chem* 280: 34048–34055.  
1018 <https://doi.org/10.1074/jbc.m506655200>
- 1019 Zhuri D., H. Gurkan, D. Eker, Y. Karal, S. Yalcintepe, *et al.*, 2022 Investigation on the Effects of  
1020 Modifying Genes on the Spinal Muscular Atrophy Phenotype. *Global Medical Genetics* 09:  
1021 226–236. <https://doi.org/10.1055/s-0042-1751302>
- 1022



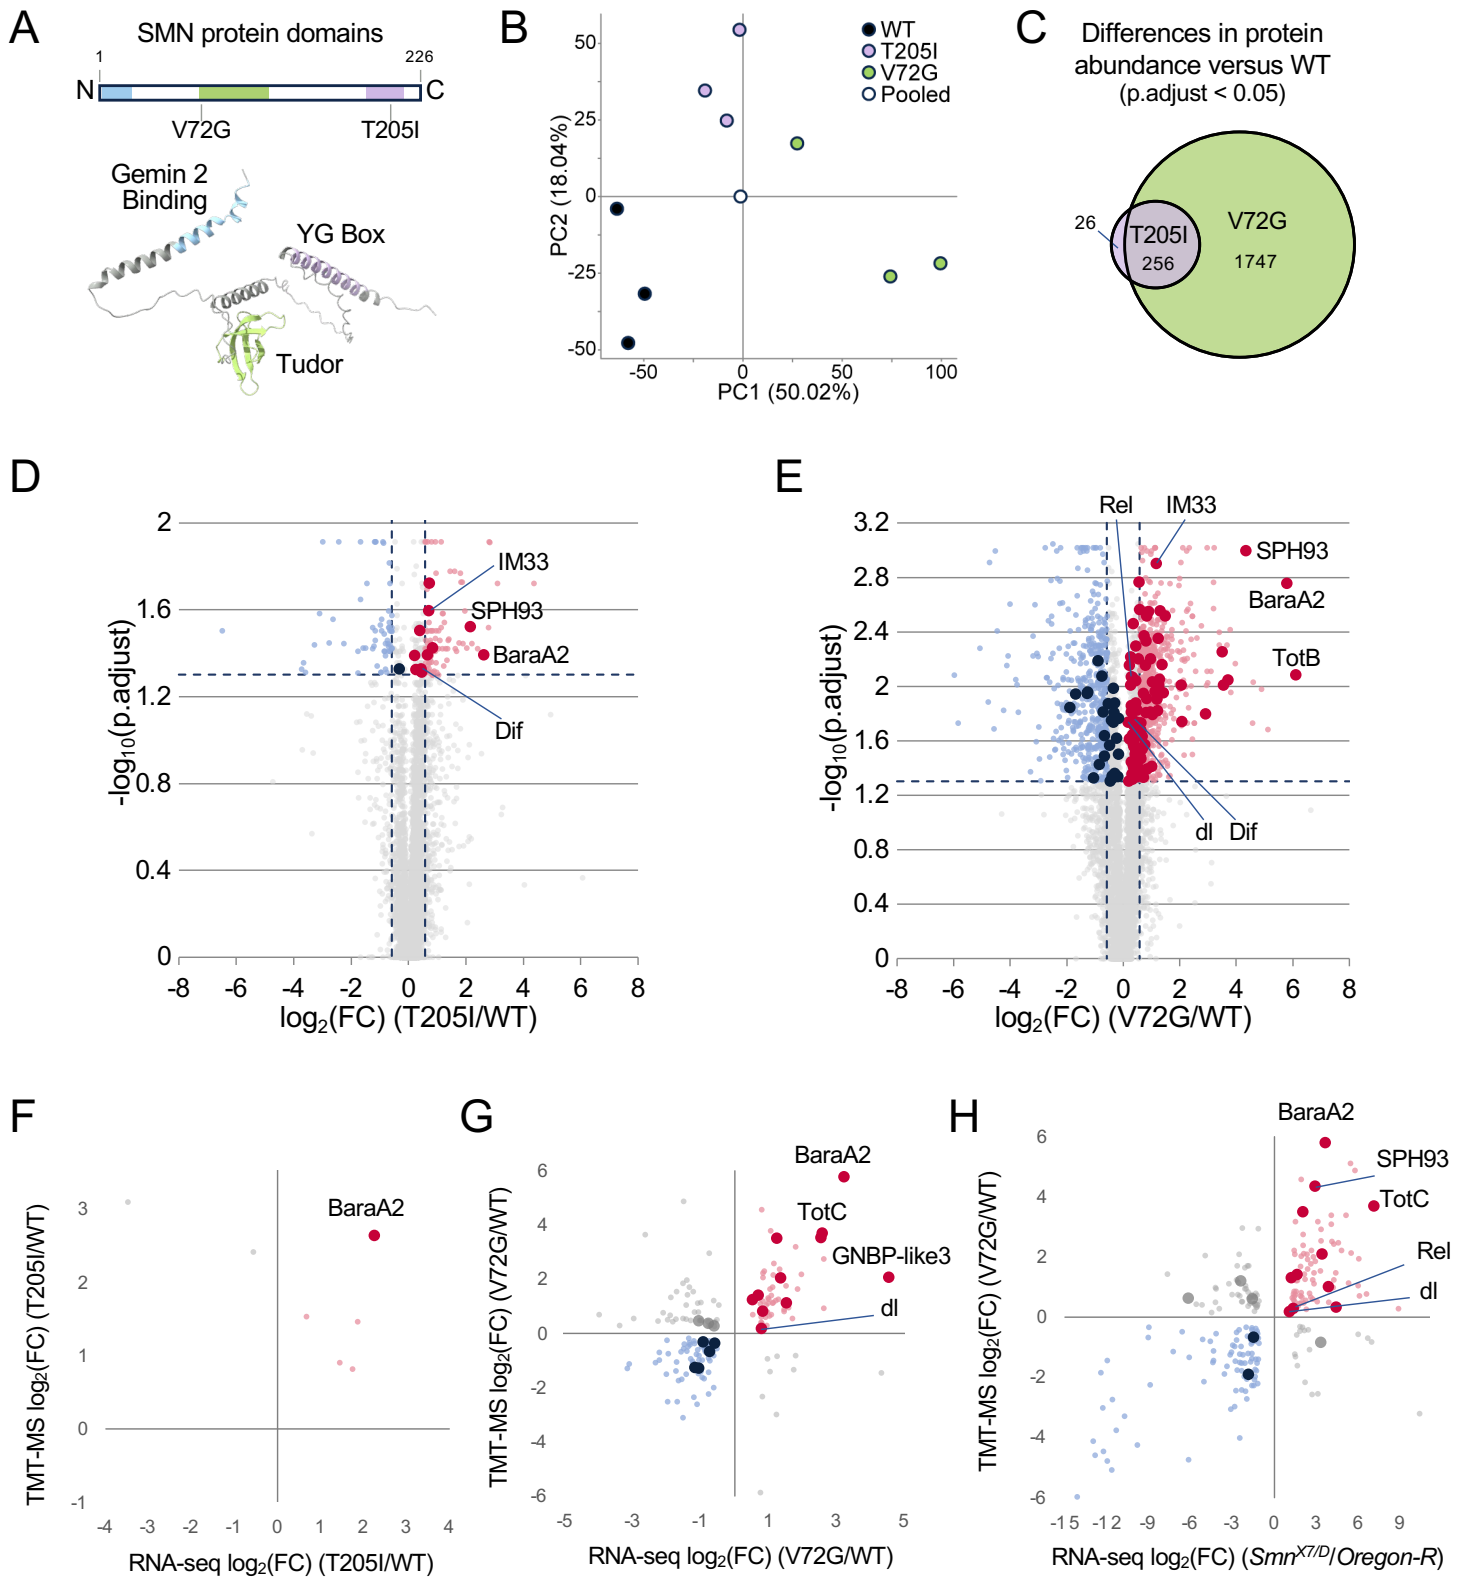

Figure 1

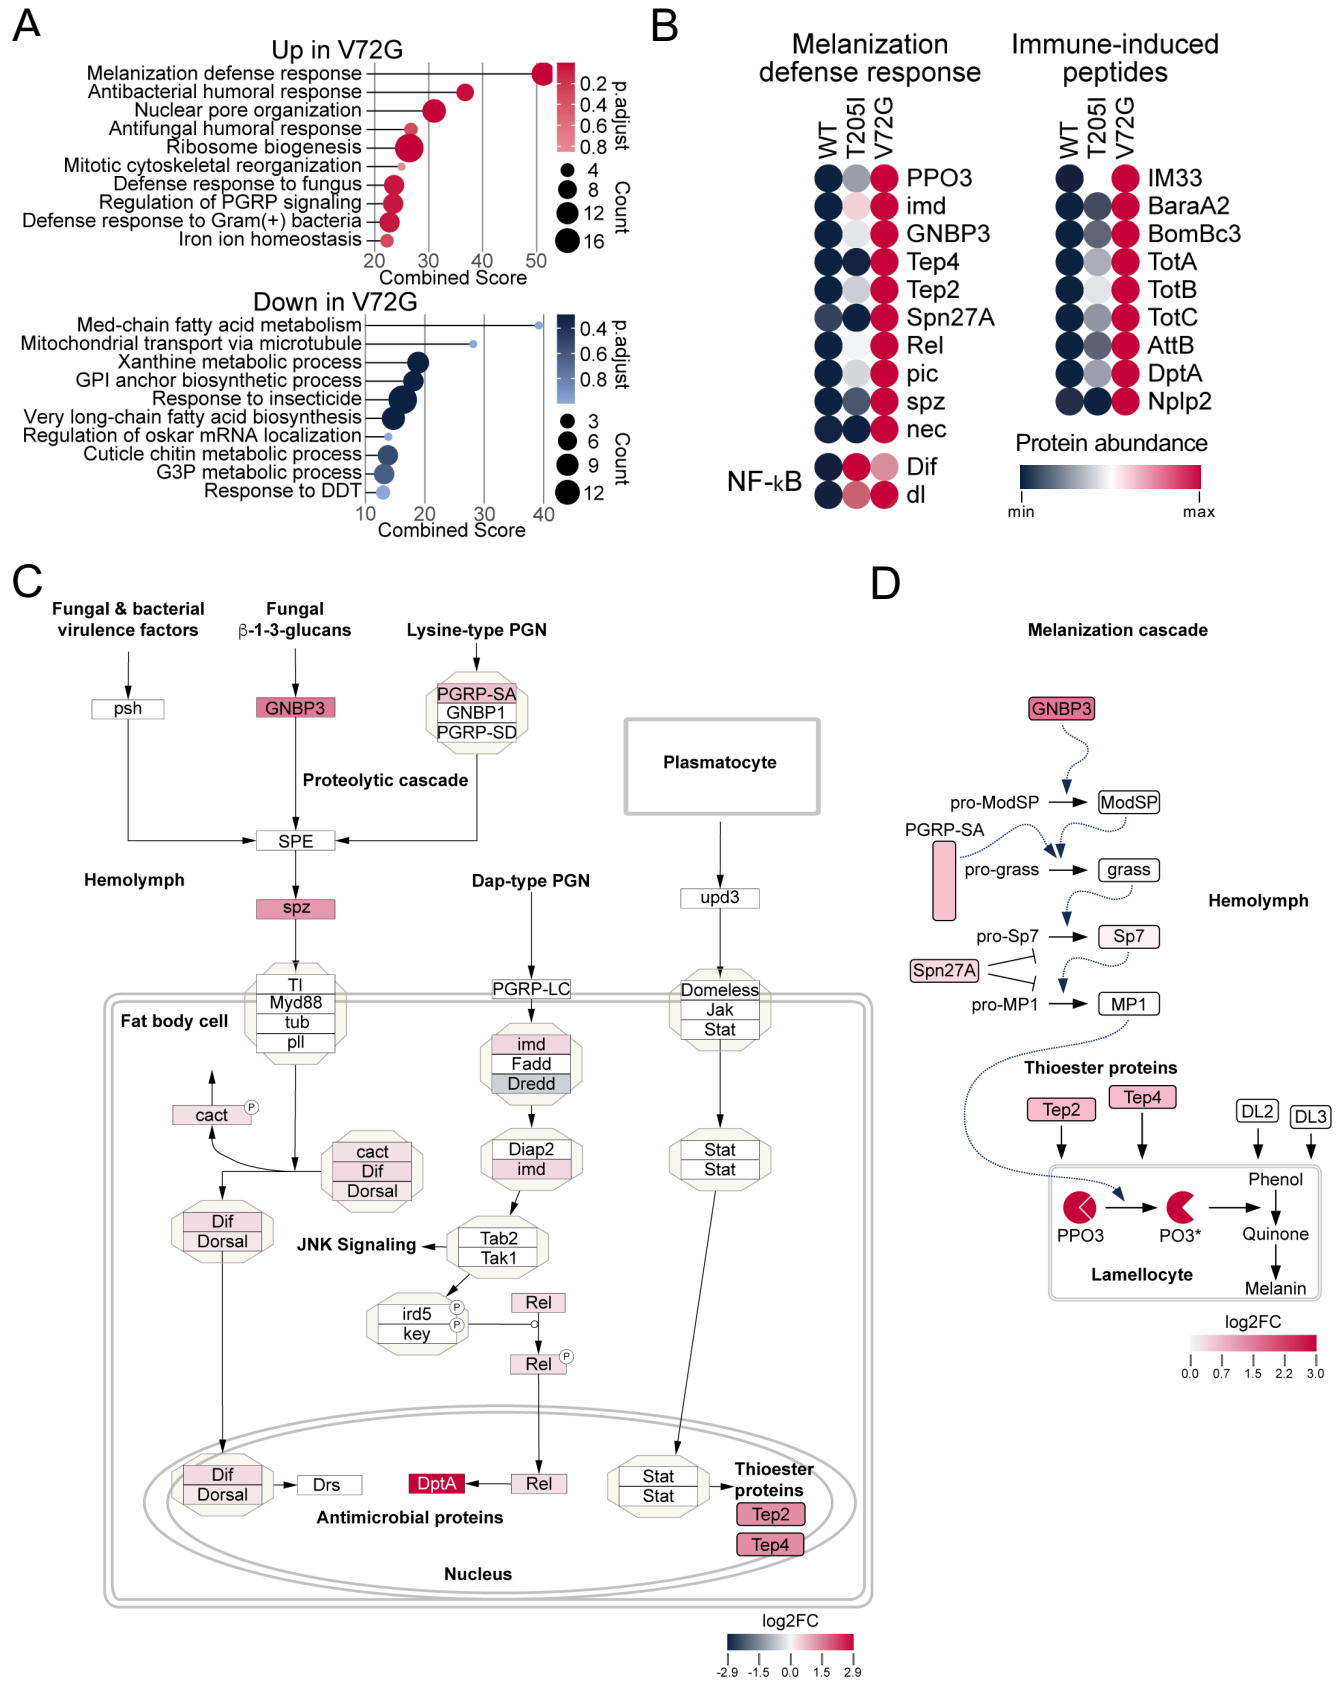

Figure 2



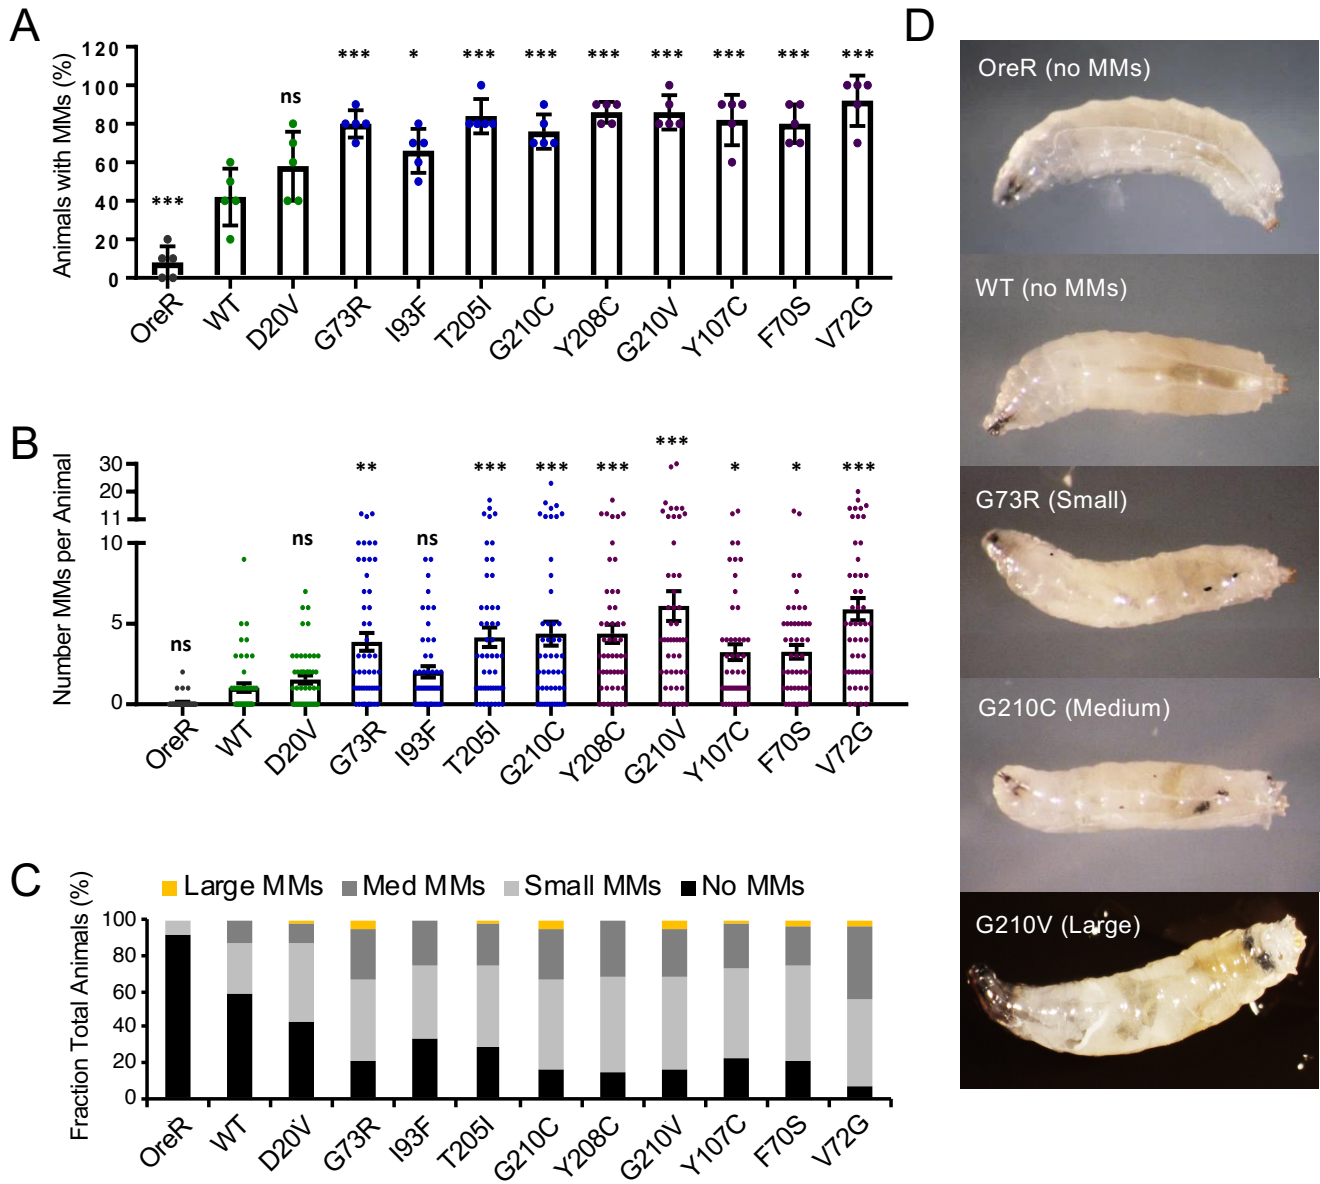

Figure 3

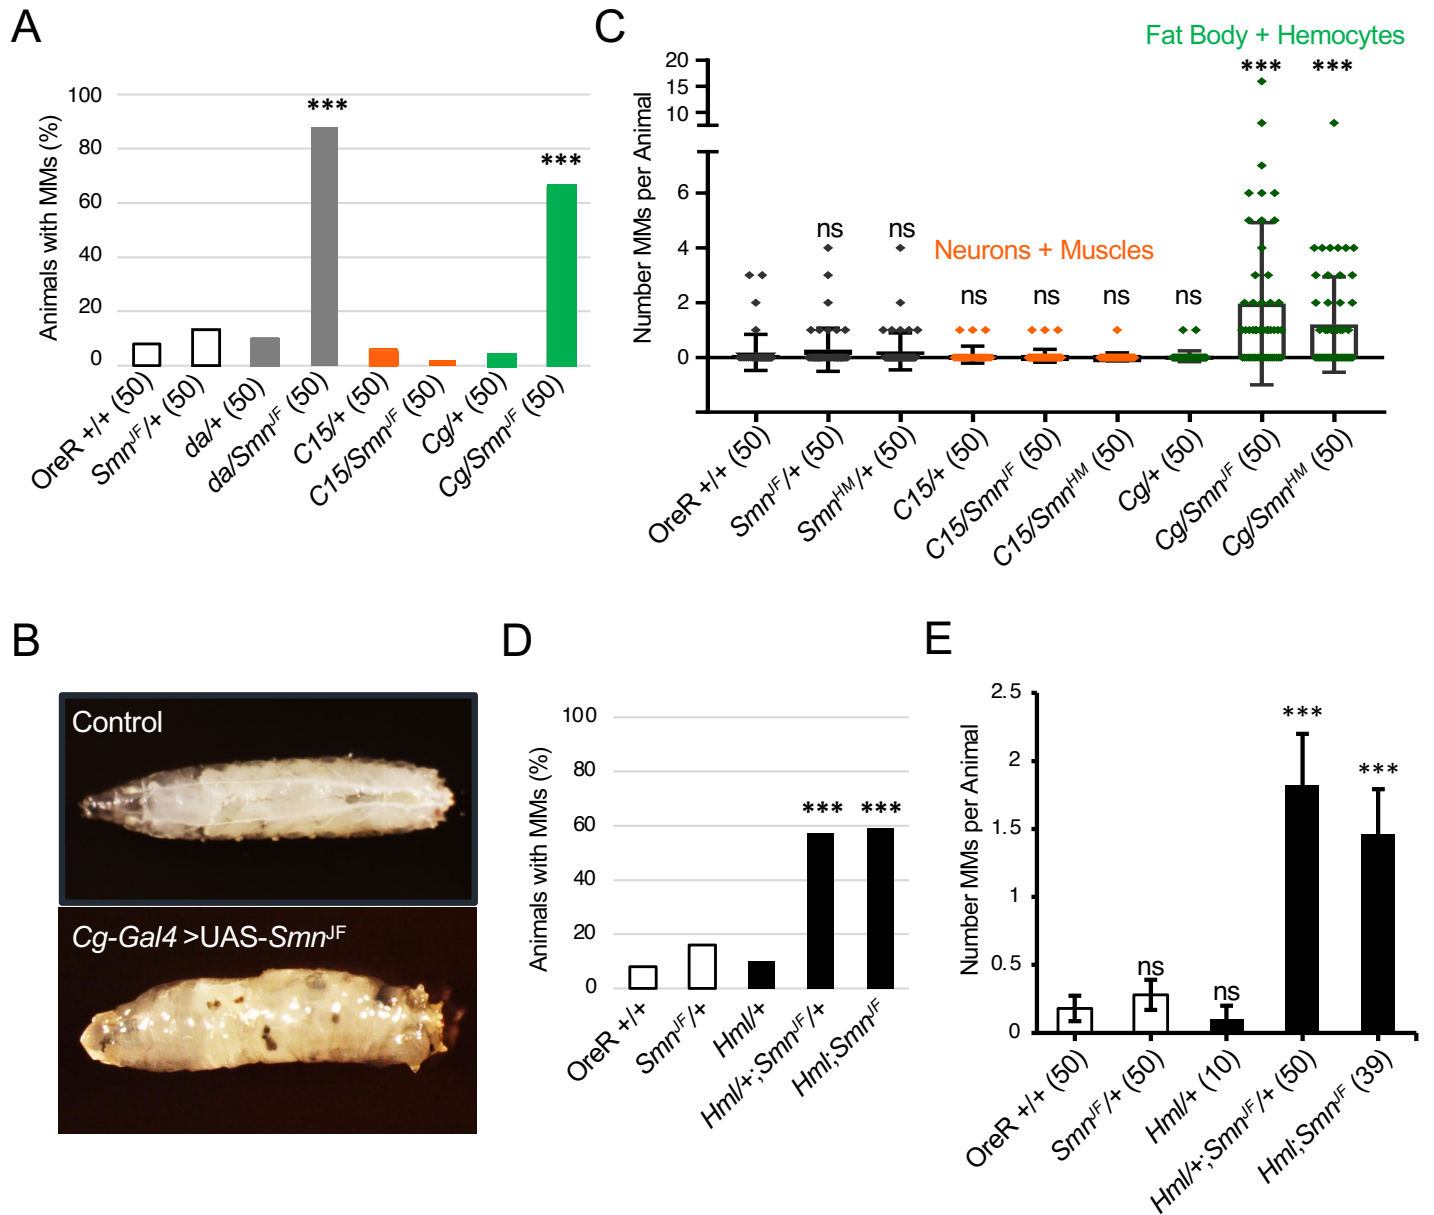

Figure 4

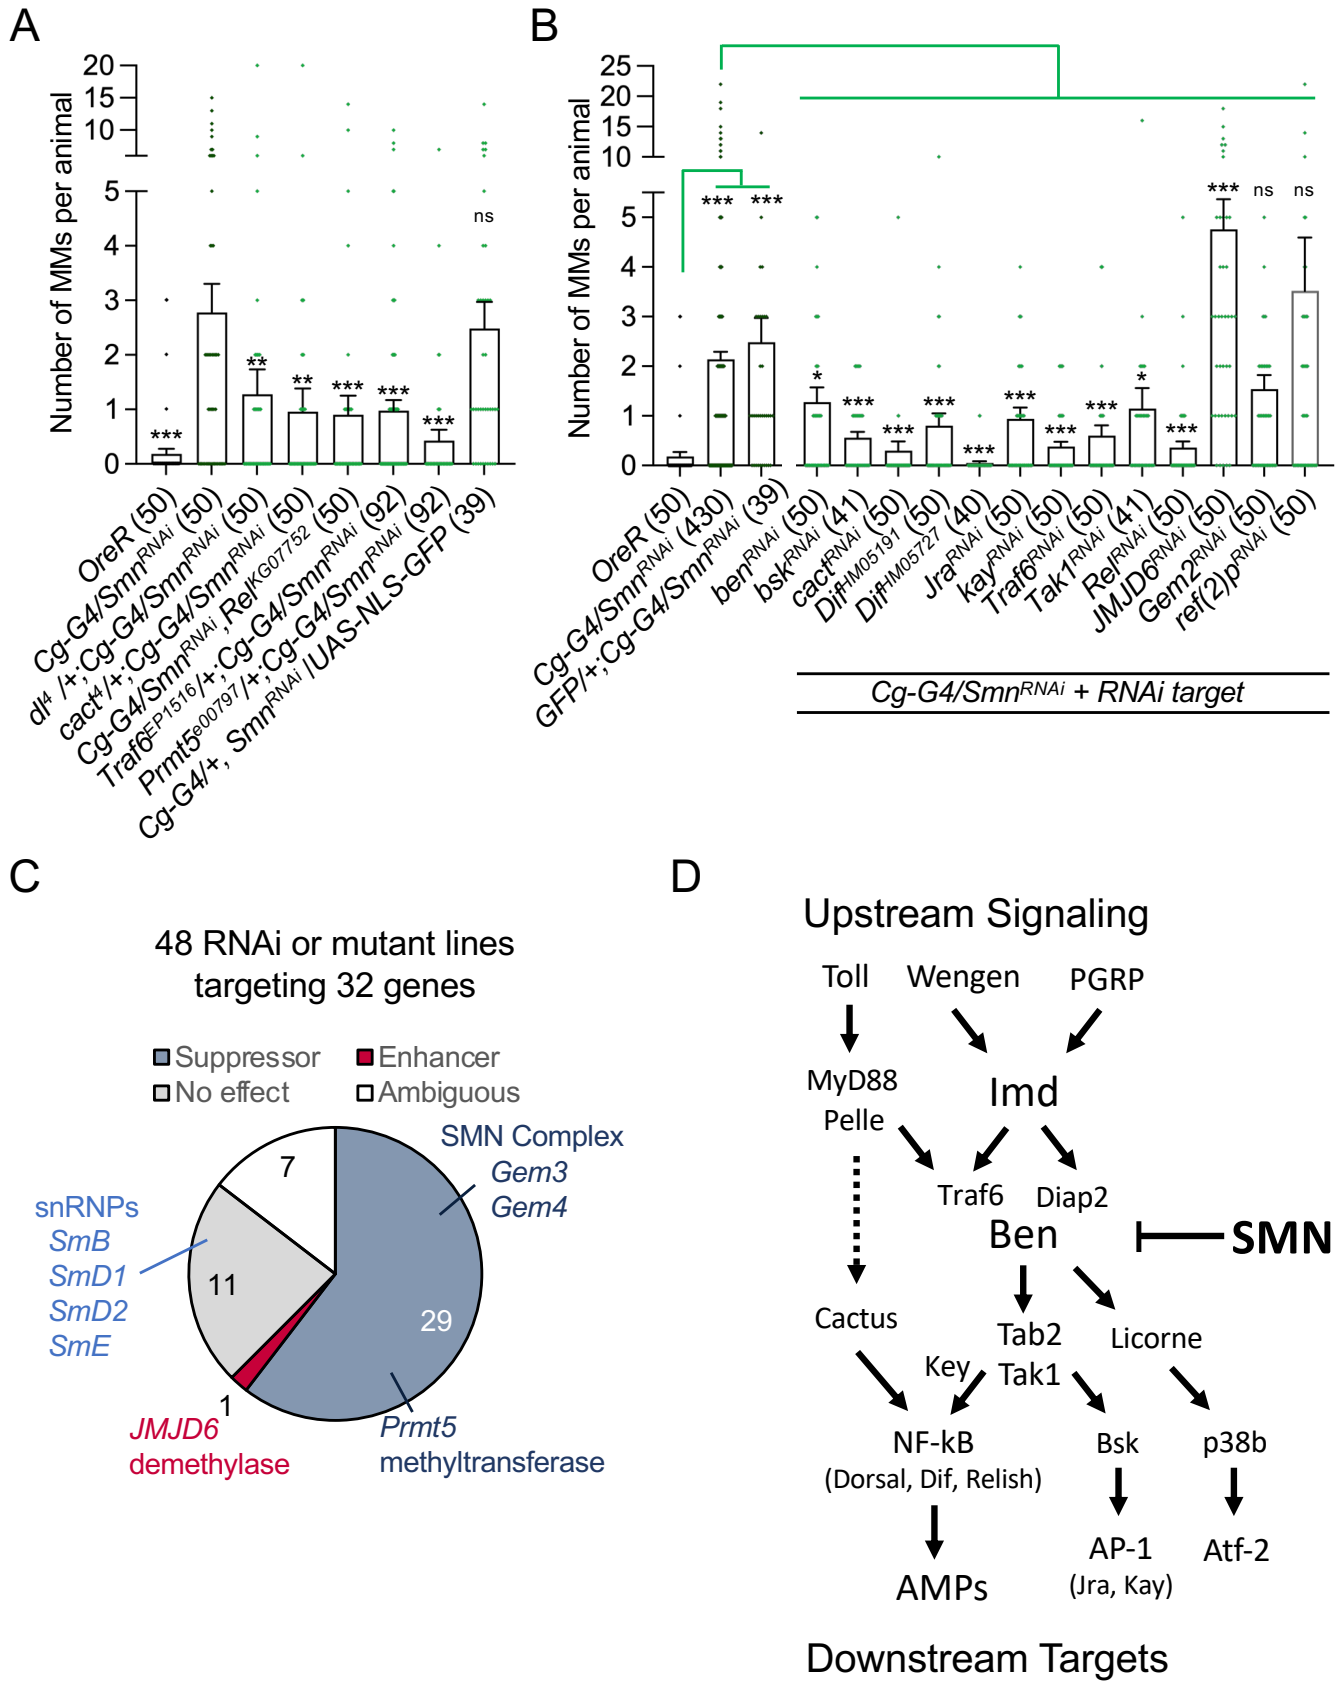

Figure 5

**A**

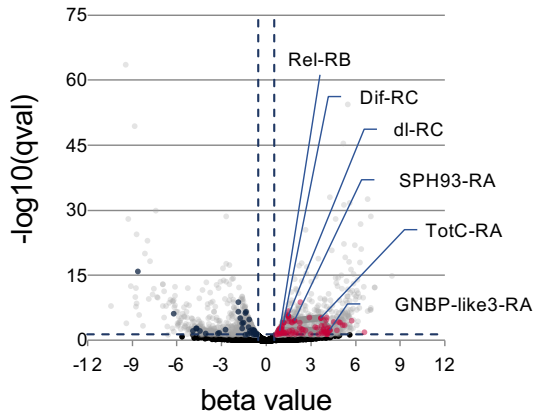

**B**

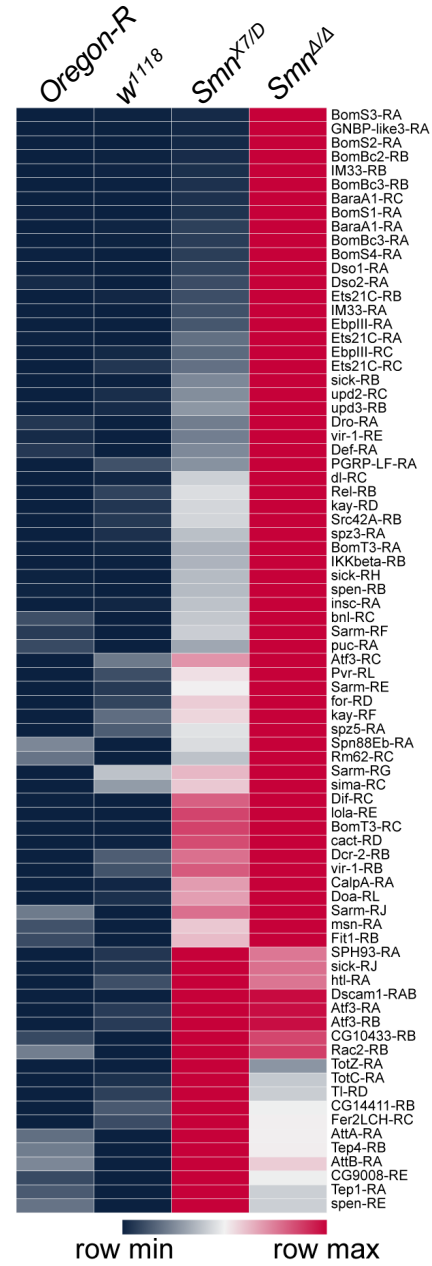

**C**

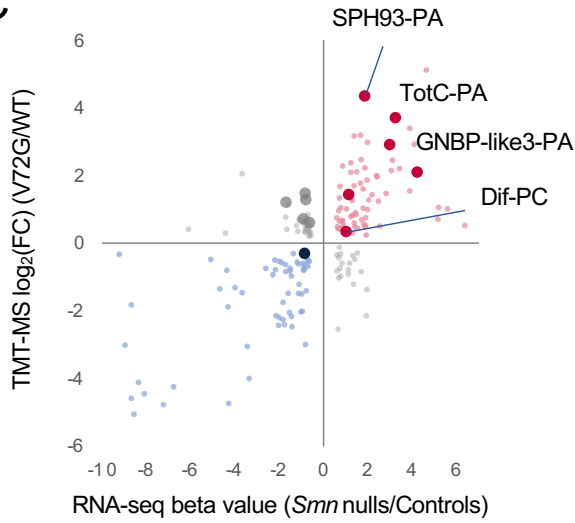

A

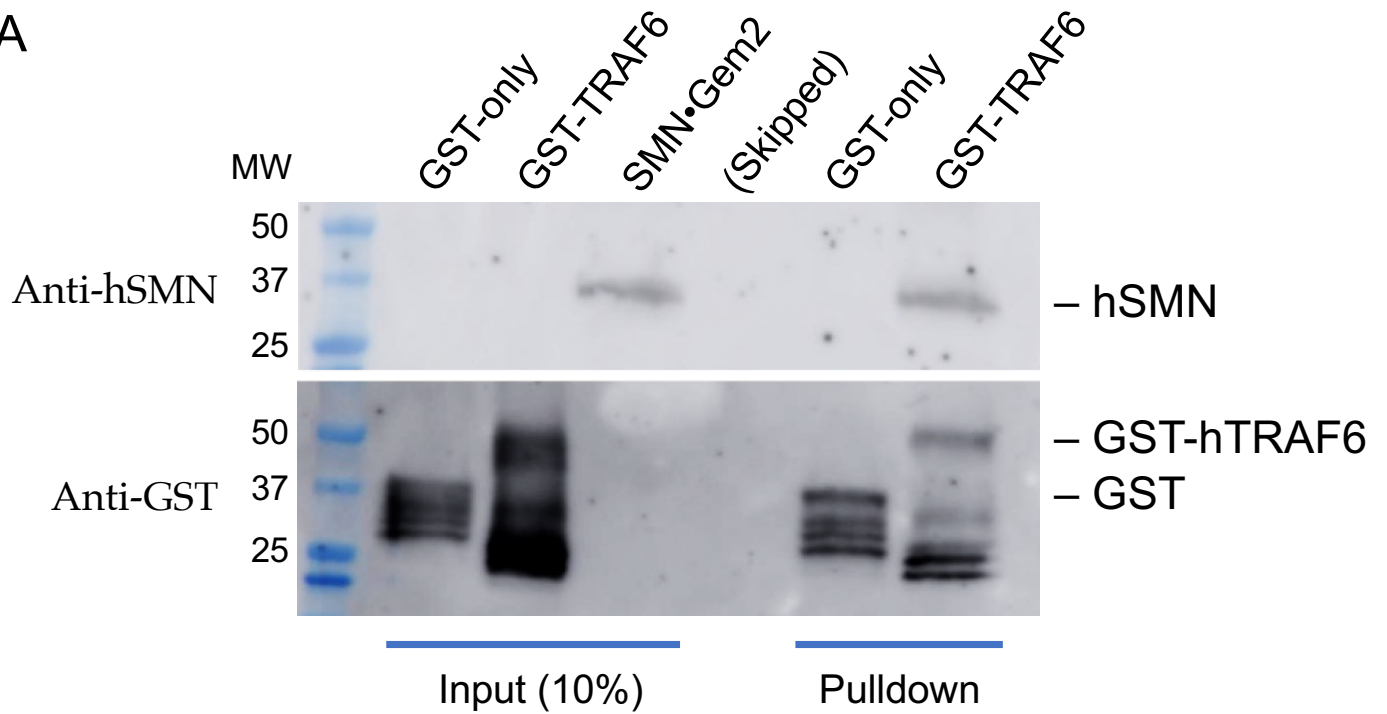

B

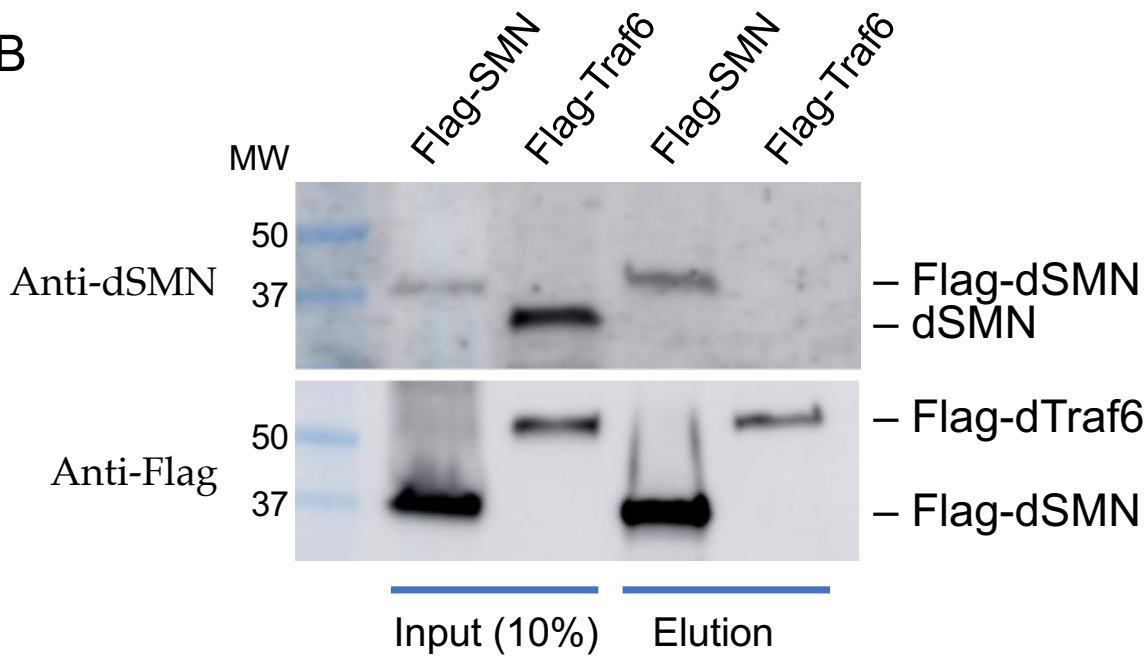

Figure S2
